# Supplementary material for: Theoretical study on the concerted catalysis of Ir/Ni for amino radical transfer for C(sp2)–C(sp3) bond formation
Source: Royal Society of Chemistry journal article supplement (doi:10.1039/d4dt02567a), 2024-01-01
Supplement: d4dt02567a1.pdf [file d4dt02567a1.pdf]

# Theoretical Study on the Concerted Catalysis of Ir/Ni for Amino Radical Transfer for C(sp<sup>2</sup>)-C(sp<sup>3</sup>) Bond Formation

Hui Li<sup>a,b\*</sup>, He Zheng<sup>a,b</sup>

E-mail: lihui@nun.edu.cn

## Supporting Information

### Table of Contents

|                                                                                                                     |    |
|---------------------------------------------------------------------------------------------------------------------|----|
| Table S1. Energies for all stationary points.....                                                                   | 2  |
| Figure S1. The generation process of amino radicals. ....                                                           | 4  |
| Figure S2. The bond length during the proton transfer transition state. ....                                        | 5  |
| Table S2. Energies for INT1 and TS1-2. ....                                                                         | 6  |
| Figure S3. The spin layout during the proton transfer transition state.....                                         | 7  |
| Figure 4. The NPA charge during the process of proton transfer.....                                                 | 8  |
| Utilizing Marcus theory for the computation of energy barriers associated with single electron transfer steps. .... | 9  |
| Table S2. Energy barriers data of single electron transfe.....                                                      | 10 |
| Calculation details of redox potential.....                                                                         | 11 |
| Cartesian coordinates and energies.....                                                                             | 14 |

**Table S1. Energies for all stationary points.**

Energies calculated at B3LYP(D3)/(6-31g(d), SDD) level in gas phase, and correction solvation energies calculated at M06(D3)/(def-TZVP, SDD) in DMF of reaction pathways. (unit: Hartree)

|                      | <i>E</i>     | <i>G</i>     | <i>G<sub>corr</sub></i> | <i>E<sub>sol</sub></i> |
|----------------------|--------------|--------------|-------------------------|------------------------|
| <b>R</b>             | -287.8028913 | -287.695458  | 0.107433                | -287.7061508           |
| <b>R<sup>-</sup></b> | -287.5231152 | -287.416687  | 0.106428                | -287.5051021           |
| <b>R<sup>+</sup></b> | -288.1755273 | -288.052974  | 0.122554                | -288.1717412           |
| <b>O</b>             | -575.3671959 | -575.136692  | 0.230505                | -575.2296821           |
| <b>1</b>             | -575.3692013 | -575.137935  | 0.231266                | -575.234637            |
| <b>R1</b>            | -1008.489772 | -1008.081172 | 0.408601                | -1008.1204269          |
| <b>R2</b>            | -3031.247849 | -3031.151246 | 0.096599                | -3033.4466291          |
| <b>N1</b>            | -287.1493001 | -287.056735  | 0.092565                | -287.0485307           |
| <b>N2</b>            | -1295.663886 | -1295.135335 | 0.528551                | -1295.1919731          |
| <b>N3</b>            | -698.555321  | -698.287232  | 0.268088                | -698.3112416           |
| <b>N4</b>            | -597.1127123 | -596.880385  | 0.232328                | -596.8859236           |
| <b>M1</b>            | -5113.503490 | -5113.214223 | 0.289267                | -5115.5690968          |
| <b>M2</b>            | -2679.387962 | -2678.96098  | 0.426982                | -2679.0227102          |
| <b>M3</b>            | -5113.570123 | -5113.280158 | 0.289892                | -5115.6228686          |
| <b>M4</b>            | -5113.555232 | -5113.26819  | 0.287042                | -5115.6031401          |
| <b>M5</b>            | -5710.679064 | -5710.127895 | 0.551170                | -5712.4931601          |
| <b>M6</b>            | -5710.733921 | -5710.18262  | 0.551301                | -5712.5400395          |
| <b>M7</b>            | -4654.010446 | -4653.84279  | 0.167655                | -4656.2431403          |
| <b>M8</b>            | -2541.763804 | -2541.47344  | 0.290364                | -2541.4784329          |
| <b>M9</b>            | -3138.969046 | -3138.415607 | 0.553438                | -3138.4372937          |
| <b>M10</b>           | -3138.962437 | -3138.407405 | 0.555032                | -3138.4449602          |
| <b>M11</b>           | -3138.968062 | -3138.413589 | 0.554473                | -3138.446773           |
| <b>M12</b>           | -2082.131341 | -2081.959526 | 0.171815                | -2082.0185963          |
| <b>P</b>             | -1056.729609 | -1056.370545 | 0.359064                | -1056.3440457          |
| <b>PC1</b>           | -2942.823398 | -2942.225965 | 0.597433                | -2942.1003572          |
| <b>PC2</b>           | -2942.723467 | -2942.133092 | 0.590375                | -2942.0015622          |
| <b>PC3</b>           | -2942.973188 | -2942.377078 | 0.596110                | -2942.2043353          |
| <b>TS</b>            | -575.365897  | -575.138044  | 0.227853                | -575.2289639           |
| <b>TS1-2</b>         | -1295.662381 | -1295.134985 | 0.527396                | -1295.1870536          |
| <b>TS2a</b>          | -5710.673407 | -5710.121479 | 0.551928                | -5712.4859657          |
| <b>TS2b</b>          | -5113.492204 | -5113.205027 | 0.287177                | -5115.5487135          |
| <b>TS2c</b>          | -5113.483623 | -5113.195156 | 0.288467                | -5115.533617           |
| <b>TS3a</b>          | -5710.720194 | -5710.170398 | 0.549795                | -5712.5360833          |

---

|             |              |              |          |               |
|-------------|--------------|--------------|----------|---------------|
| <b>TS3b</b> | -5710.685129 | -5710.14048  | 0.544648 | -5712.4884979 |
| <b>TS4a</b> | -3138.919792 | -3138.36574  | 0.554057 | -3138.4028228 |
| <b>TS4b</b> | -3138.887632 | -3138.340749 | 0.546882 | -3138.3678566 |

---

Figure S1. The generation process of amino radicals.

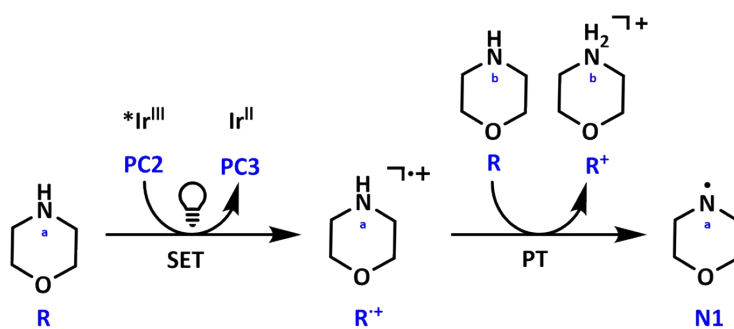

Figure S2. The bond length during the proton transfer transition state.

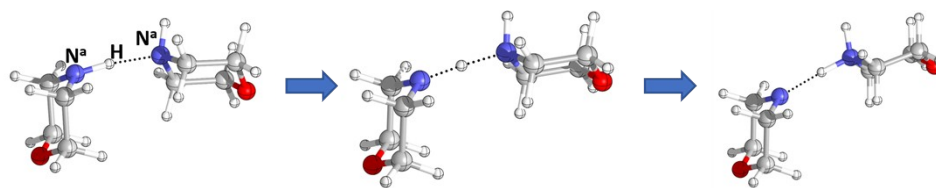

**INT1**

**TS1-2**

**INT2**

Bond length of N<sup>a</sup>-H (Å) 1.10

1.26

1.62

Bond length of N<sup>a</sup>-H (Å) 1.63

1.34

1.10

**Table S2. Energies for INT1 and TS1-2.**

|           | <i>E</i>    | $\Delta E$ | <i>H</i>    | $\Delta H$ | <i>G</i>    | $\Delta G$ |
|-----------|-------------|------------|-------------|------------|-------------|------------|
| <b>0</b>  | -575.367196 | 0          | -575.081734 | 0          | -575.136691 | 0          |
| <b>TS</b> | -575.365897 | 0.001299   | -575.083918 | -0.002184  | -575.138044 | -0.001353  |

The energy analysis results reveal that the potential energy of transition state TS1-2 exceeds that of INT1, while the Gibbs free energy is marginally lower than that of the transition state. Simultaneously, a negative reaction enthalpy change suggests the presence of an entropy effect in this process.

Figure S3. The spin layout during the proton transfer transition state.

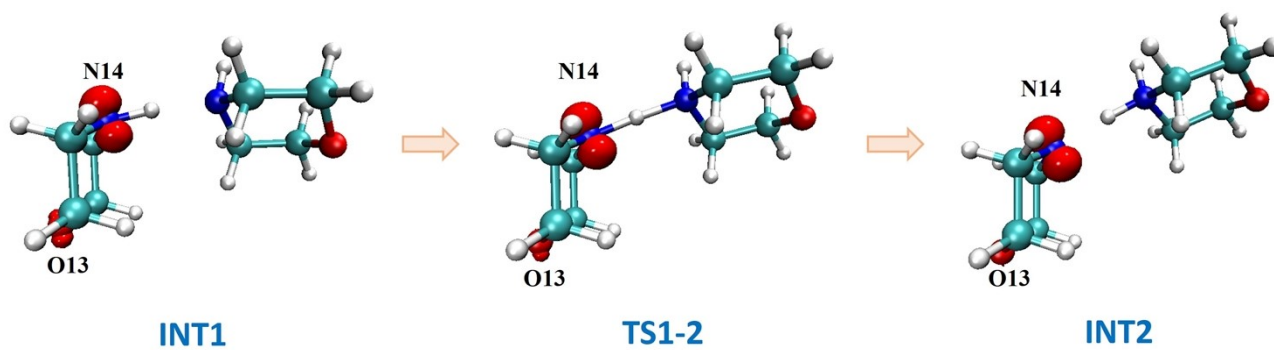

|                 | 0        | TS       | 1        | N1       |
|-----------------|----------|----------|----------|----------|
| O <sup>13</sup> | 0.103024 | 0.080085 | 0.042625 | 0.014088 |
| N <sup>14</sup> | 0.695452 | 0.744863 | 0.830684 | 0.889923 |

Figure 4. The NPA charge during the process of proton transfer.

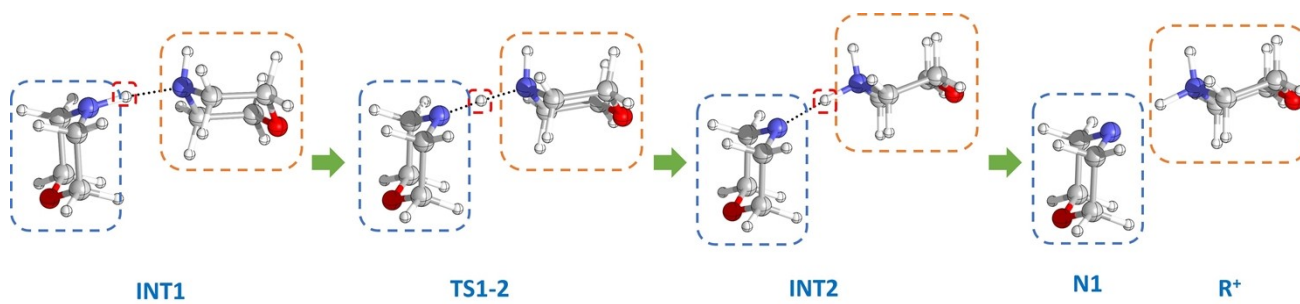

|                     | INT1  | TS 1-2 | INT2  | N1 and R <sup>+</sup> |
|---------------------|-------|--------|-------|-----------------------|
| fragment 1 (blue)   | 0.411 | 0.304  | 0.139 | 0.000                 |
| fragment 2 (red)    | 0.455 | 0.456  | 0.475 | —                     |
| fragment 3 (orange) | 0.134 | 0.240  | 0.386 | 1.000                 |



## Utilizing Marcus theory for the computation of energy barriers associated with single electron transfer steps.

According to the Marcus-Hush equation, the reorganization energy  $\lambda$  can be decomposed into two components: inner-sphere reorganization energy ( $\lambda_i$ ) and outer-sphere solvent reorganization energy ( $\lambda_o$ ), as shown in Equation S1. The calculation of inner-sphere reorganization energy ( $\lambda_i$ ) can be performed using Equation S2.

$$\lambda = \lambda_i + \lambda_o \quad \text{Equation S1}$$

$$\lambda_i = |E^D(Q_P) - E^D(Q_R)| + |E^{A^-}(Q_P) - E^{A^-}(Q_R)| \quad \text{Equation S2}$$

In the Equation S2,  $D$  represents the recombination energy of the electron-donating substrate, while  $A$  represents that of the electron-accepting substrate.  $Q_R$  and  $Q_P$  respectively denote the equilibrium geometries of reactants and products.

The Equation S3 represents for the solvent recombination energy  $\lambda_o$  of an external sphere.

$$\lambda_o = (332 \text{ kcal/mol}) \left( \frac{1}{2a_1} + \frac{1}{2a_2} - \frac{1}{R} \right) \left( \frac{1}{\epsilon_{op}} - \frac{1}{\epsilon} \right) \quad \text{Equation S3}$$

Among them,  $a_1$  and  $a_2$  represent the radii of reactants,  $\epsilon_{op}$  denotes the optical dielectric constant (2.038),  $\epsilon$  signifies the static dielectric constant (37.219) of N,N-dimethylformamide solvent, and  $\Delta G_r$  represents the change in free energy for SET reaction.

The equation S4 represents the calculation formula for the overall activation energy barrier of the SET process, where  $\Delta G_r$  denotes the change in Gibbs free energy during the reaction.

$$\Delta G_{SET}^\ddagger = \frac{\lambda}{4} \left( 1 + \frac{\Delta G_r}{\lambda} \right)^2 \quad \text{Equation S4}$$

**Table S3. Energy barriers data of single electron transfe.**

| SET | $a_1$ | $a_2$ | $R$    | $\lambda_o$ | $\lambda_i$ | $\lambda$ | $\Delta G_r$ | $\Delta G_{SET}^\ddagger$ |
|-----|-------|-------|--------|-------------|-------------|-----------|--------------|---------------------------|
| 1   | 3.624 | 8.594 | 12.218 | 17.591      | 21.758      | 39.349    | 1.886        | 10.802                    |
| 2   | 5.930 | 8.685 | 14.615 | 11.312      | 19.600      | 30.912    | 32.500       | 32.509                    |
| 3   | 8.984 | 8.685 | 17.669 | 8.719       | 21.936      | 30.655    | -7.297       | 4.450                     |

The radii of the reactants in the first single electron transfer process were calculated as  $a_1$  equals 3.624 and  $a_2$  equals 8.594, with  $R$  equals 12.218 Å. The change in  $\Delta G_r$  is determined to be 1.886 kcal·mol<sup>-1</sup>, while  $\lambda_i$  and  $\lambda_o$  are found to be 21.758 kcal·mol<sup>-1</sup> and 17.591 kcal·mol<sup>-1</sup> respectively. By substituting these values into equation S1, it can be deduced that  $\lambda$  equals 39.349 kcal·mol<sup>-1</sup>, thereby indicating an activation energy barrier of 10.802 kcal·mol<sup>-1</sup> for the SET process.

In the second SET process, the values of  $a_1$ ,  $a_2$ , and  $R$  are determined to be 5.930, 8.685, and 14.615 respectively. The change in  $\Delta G_r$  is calculated as 32.500 kcal·mol<sup>-1</sup> while  $\lambda_i$  is measured at 19.600 kcal·mol<sup>-1</sup> and  $\lambda_o$  at 11.312 kcal·mol<sup>-1</sup>; consequently yielding an overall value of  $\lambda$  equal to 30.912 kcal·mol<sup>-1</sup>. Consequently, employing the same methodology allows us to determine that the activation energy barrier for this SET process amounts to approximately 32.509 kcal·mol<sup>-1</sup>.

Similarly for the third SET process with relevant data inputted, suggested that the energy barrier is estimated to be around 4.450 kcal·mol<sup>-1</sup>.

### Calculation details of redox potential.

The correlation between the variation in standard  $G$  and the standard potential (V).

$$E^0 = \frac{\Delta G_r^0}{nF} \quad \text{Equation S5}$$

The relationship between the change in  $G$  of oxidation reaction and the oxidation potential is primarily determined by ionization energy, which is closely associated with  $E_{(\text{HOMO})}$ . Conversely, the relationship between the change in  $G$  of reduction reaction and the reduction potential is primarily governed by electron affinity, which is closely linked to  $E_{(\text{LUMO})}$ .

$$E_{OX}^0 = \frac{\Delta G_{OX}^0}{nF} \quad \text{Equation S6}$$

$$E_{red}^0 = \frac{\Delta G_{red}^0}{nF} \quad \text{Equation S7}$$

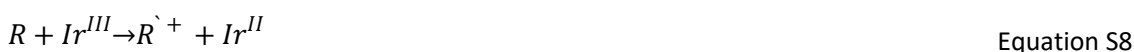

### Oxidation potential calculation.

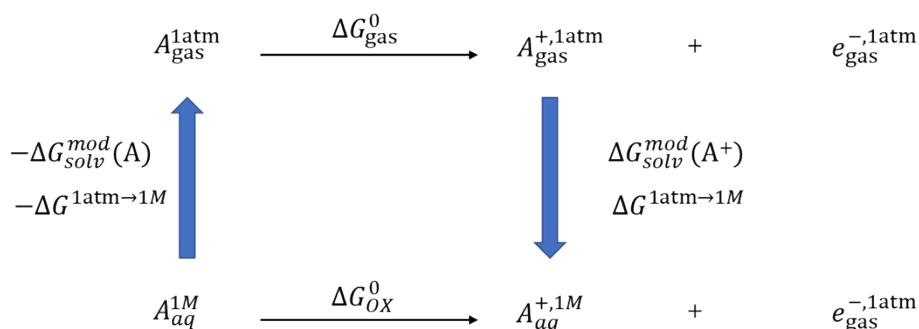

$$\Delta G_{OX}^0 = \Delta G_{gas}^0 + \Delta G_{solv}^{mod}(A^+) - \Delta G_{solv}^{mod}(A) \quad \text{Equation S9}$$

$$E_{OX-SHE} = \Delta G_{OX}^0 - 4.28 \quad \text{Equation S10}$$

$$\Delta G_{gas}^0 = 27.2114 * (-287.416687 + 287.695458) = 7.586 \text{ eV}$$

$$E_{OX-SHE} = \Delta G_{OX}^0 - 4.28$$

### Restoration of potential calculation.

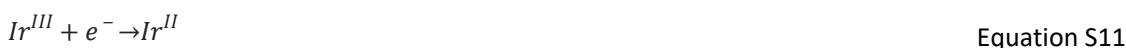

$$\Delta G_{red}^0 = \Delta G_{gas}^0 + \Delta G_{solv}^{mod}(A^-) - \Delta G_{solv}^{mod}(A) \quad \text{Equation S12}$$

$$\Delta G_{gas}^0 = G_{gas}^0(A^-) - G_{gas}^0(A) - G_{gas}^0(e^-) \quad \text{Equation S13}$$

$$G_{gas}^0(e^-) = 0 \quad \text{Equation S14}$$

$$\Delta G_{gas}^0 = 27.2114 * (-2942.377078 + 2942.133092) = -6.639 \text{ eV}$$

$$\begin{aligned} E_{red-SHE} &= -\Delta G_{red}^0 - 4.28 \\ &= -\Delta G_{gas}^0 - \Delta G_{solv}^{mod}(A^-) + \Delta G_{solv}^{mod}(A) - 4.28 \end{aligned}$$

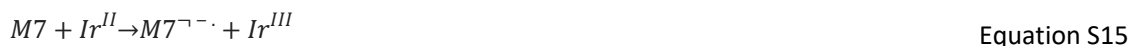

**Oxidation potential calculation.**

$$\Delta G_{OX}^0 = \Delta G_{gas}^0 + \Delta G_{solv}^{mod}(A^+) - \Delta G_{solv}^{mod}(A)$$

$$E_{OX-SHE} = \Delta G_{OX}^0 - 4.28$$

$$\Delta G_{gas}^0 = 27.2114 * (-2942.225965 + 2942.377078) = 4.112 \text{ eV}$$

$$\begin{aligned} E_{OX-SHE} &= \Delta G_{OX}^0 - 4.28 \\ &= \Delta G_{gas}^0 + \Delta G_{solv}^{mod}(A^+) - \Delta G_{solv}^{mod}(A) - 4.28 \end{aligned}$$

**Restoration of potential calculation.**

$$\Delta G_{red}^0 = \Delta G_{gas}^0 + \Delta G_{solv}^{mod}(A^-) - \Delta G_{solv}^{mod}(A)$$

$$\Delta G_{gas}^0 = G_{gas}^0(A^-) - G_{gas}^0(A) - G_{gas}^0(e^-) \quad G_{gas}^0(e^-) = 0$$

$$\Delta G_{gas}^0 = 27.2114 * (-4653.837827 + 4653.842799) = 0.135 \text{ eV}$$

$$\Delta G_{solv}^{mod}(A) = 27.2114 * (-4653.7337747 + 4653.7124341) = -0.581 \text{ eV}$$

$$\Delta G_{solv}^{mod}(A^-) = 27.2114 * (-4653.7391560 + 4653.8190546) = -2.174 \text{ eV}$$

$$\begin{aligned} E_{red-SHE} &= -\Delta G_{red}^0 - 4.28 \\ &= -\Delta G_{gas}^0 - \Delta G_{solv}^{mod}(A^-) + \Delta G_{solv}^{mod}(A) - 4.28 \\ &= -2.822 \text{ eV} \end{aligned}$$

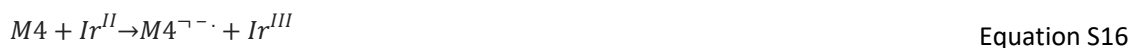

**Oxidation potential calculation.**

$$\Delta G_{OX}^0 = \Delta G_{gas}^0 + \Delta G_{solv}^{mod}(A^+) - \Delta G_{solv}^{mod}(A)$$

$$E_{OX-SHE} = \Delta G_{OX}^0 - 4.28$$

$$\Delta G_{gas}^0 = 27.2114 * (-2942.225965 + 2942.377078) = 4.112 \text{ eV}$$

$$\Delta G_{solv}^{mod}(A) = 27.2114 * (-2942.5554227 + 2942.5251003) = -0.825 \text{ eV}$$

$$\Delta G_{solv}^{mod}(A^+) = 27.2114 * (-2942.4578226 + 2942.3750722) = -2.252 \text{ eV}$$

$$E_{OX-SHE} = \Delta G_{OX}^0 - 4.28$$

$$= \Delta G_{gas}^0 + \Delta G_{solv}^{mod}(A^+) - \Delta G_{solv}^{mod}(A) - 4.28$$

$$= -1.594 \text{ eV}$$

**Restoration of potential calculation.**

$$\Delta G_{red}^0 = \Delta G_{gas}^0 + \Delta G_{solv}^{mod}(A^-) - \Delta G_{solv}^{mod}(A)$$

$$\Delta G_{gas}^0 = G_{gas}^0(A^-) - G_{gas}^0(A) - G_{gas}^0(e^-) \quad G_{gas}^0(e^-) = 0$$

$$\Delta G_{gas}^0 = 27.2114 * (-5113.328034 + 5113.26819) = -1.628 \text{ eV}$$

$$\Delta G_{solv}^{mod}(A) = 27.2114 * (-5113.3003538 + 5113.2535616) = -1.273 \text{ eV}$$

$$\Delta G_{solv}^{mod}(A^-) = 27.2114 * (-5113.3753273 + 5113.2936216) = -2.223 \text{ eV}$$

$$E_{red-SHE} = -\Delta G_{red}^0 - 4.28$$

$$= -\Delta G_{gas}^0 - \Delta G_{solv}^{mod}(A^-) + \Delta G_{solv}^{mod}(A) - 4.28$$

$$= -1.702 \text{ eV}$$

## Cartesian coordinates and energies

R

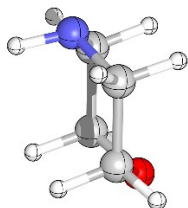

|   |             |             |             |
|---|-------------|-------------|-------------|
| C | -0.01371800 | -0.77592900 | 1.17771400  |
| C | -0.01371800 | 0.75607500  | 1.20626200  |
| C | -0.01371800 | 0.75607500  | -1.20626200 |
| C | -0.01371800 | -0.77592900 | -1.17771400 |
| H | -1.05142500 | 1.10846200  | 1.27149800  |
| H | 0.52029300  | 1.12625100  | 2.09000700  |
| H | 1.02678900  | -1.14846000 | 1.22685700  |
| H | -0.56846600 | -1.19680100 | 2.02351000  |
| H | -1.05142500 | 1.10846200  | -1.27149800 |
| H | 0.52029300  | 1.12625100  | -2.09000700 |
| H | -0.56846600 | -1.19680100 | -2.02351000 |
| H | 1.02678900  | -1.14846000 | -1.22685700 |
| O | -0.64918400 | -1.26290700 | 0.00000000  |
| N | 0.58339700  | 1.34550300  | 0.00000000  |
| H | 1.58455400  | 1.14407200  | 0.00000000  |

|                                              |                             |
|----------------------------------------------|-----------------------------|
| Zero-point correction=                       | 0.135883 (Hartree/Particle) |
| Thermal correction to Energy=                | 0.141169                    |
| Thermal correction to Enthalpy=              | 0.142114                    |
| Thermal correction to Gibbs Free Energy=     | 0.107433                    |
| Sum of electronic and zero-point Energies=   | -287.667008                 |
| Sum of electronic and thermal Energies=      | -287.661722                 |
| Sum of electronic and thermal Enthalpies=    | -287.660778                 |
| Sum of electronic and thermal Free Energies= | -287.695458                 |

R1

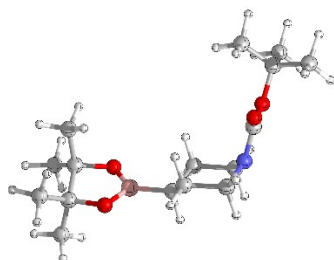

|   |             |             |             |
|---|-------------|-------------|-------------|
| B | -2.13006600 | -0.47143600 | -0.34127700 |
| O | -3.09668500 | -1.00329700 | 0.47841700  |
| O | -2.45135100 | 0.77921700  | -0.80990900 |
| C | -4.26343200 | -0.13679700 | 0.39241200  |
| C | -3.63200400 | 1.22457800  | -0.08284200 |

|   |             |             |             |
|---|-------------|-------------|-------------|
| C | -4.94056600 | -0.09422100 | 1.75861600  |
| H | -5.77348500 | 0.61793200  | 1.75471400  |
| H | -5.33775900 | -1.08414000 | 2.00406000  |
| H | -4.23849800 | 0.19107200  | 2.54487600  |
| C | -5.19935800 | -0.76518500 | -0.64693800 |
| H | -6.13899700 | -0.20984100 | -0.73273000 |
| H | -4.72352700 | -0.80172900 | -1.63200000 |
| H | -5.42745500 | -1.79094100 | -0.34234500 |
| C | -3.12615800 | 2.09203500  | 1.07576200  |
| H | -2.49526300 | 1.50926900  | 1.75420700  |
| H | -2.52244600 | 2.90883500  | 0.66900100  |
| H | -3.95390200 | 2.52162100  | 1.64920300  |
| C | -4.50211800 | 2.05027800  | -1.02472200 |
| H | -4.74735000 | 1.49672600  | -1.93350200 |
| H | -5.43450900 | 2.34605500  | -0.53062600 |
| H | -3.96693700 | 2.95919200  | -1.31692800 |
| C | 1.53749300  | -1.08441700 | -1.69594800 |
| C | 0.21426100  | -0.34312000 | -1.46256300 |
| C | -0.78459300 | -1.21532700 | -0.67373800 |
| C | -0.12807900 | -1.76794700 | 0.61669700  |
| C | 1.20855900  | -2.45749400 | 0.31131700  |
| H | 0.42544200  | 0.57831600  | -0.90347400 |
| H | -0.21936000 | -0.03598300 | -2.42222700 |
| H | 1.36452000  | -1.97017200 | -2.32365200 |
| H | 2.27054900  | -0.45643300 | -2.19961000 |
| H | 0.06745000  | -0.94627300 | 1.32007300  |
| H | -0.80907700 | -2.46449800 | 1.11956200  |
| H | 1.71746100  | -2.77084800 | 1.22292200  |
| H | 1.04023100  | -3.34361000 | -0.31624800 |
| H | -1.03823000 | -2.08934000 | -1.30025700 |
| N | 2.09710800  | -1.55260800 | -0.42342400 |
| C | 2.99858200  | -0.81804500 | 0.30800300  |
| O | 3.27405300  | -1.04230200 | 1.47917500  |
| O | 3.55297400  | 0.16472800  | -0.44808800 |
| C | 4.54975100  | 1.07824600  | 0.11776000  |
| C | 3.93399500  | 1.87767100  | 1.27069800  |
| H | 3.70115600  | 1.22626400  | 2.11371700  |
| H | 4.63626000  | 2.65197500  | 1.59964100  |
| H | 3.01353500  | 2.36877400  | 0.93551300  |
| C | 5.79734400  | 0.30139900  | 0.54947200  |
| H | 6.58200600  | 1.00438000  | 0.85136800  |
| H | 5.57123300  | -0.36218300 | 1.38476400  |
| H | 6.17520400  | -0.29644600 | -0.28719300 |
| C | 4.86459400  | 1.99396800  | -1.06755600 |

|                                              |            |            |                             |
|----------------------------------------------|------------|------------|-----------------------------|
| H                                            | 5.61138000 | 2.74107900 | -0.77916300                 |
| H                                            | 5.25888400 | 1.41216500 | -1.90715400                 |
| H                                            | 3.96050900 | 2.51372700 | -1.40151700                 |
| Zero-point correction=                       |            |            | 0.461663 (Hartree/Particle) |
| Thermal correction to Energy=                |            |            | 0.485048                    |
| Thermal correction to Enthalpy=              |            |            | 0.485992                    |
| Thermal correction to Gibbs Free Energy=     |            |            | 0.408601                    |
| Sum of electronic and zero-point Energies=   |            |            | -1008.028109                |
| Sum of electronic and thermal Energies=      |            |            | -1008.004725                |
| Sum of electronic and thermal Enthalpies=    |            |            | -1008.003780                |
| Sum of electronic and thermal Free Energies= |            |            | -1008.081172                |

R2

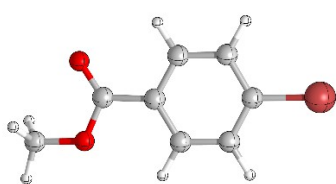

|                                              |             |             |                             |
|----------------------------------------------|-------------|-------------|-----------------------------|
| C                                            | -1.35892300 | 0.19100500  | 0.00002100                  |
| C                                            | -0.73637200 | -1.06448400 | -0.00007900                 |
| C                                            | 0.65318000  | -1.15950600 | -0.00008900                 |
| C                                            | 1.41398400  | 0.01023000  | 0.00002200                  |
| C                                            | 0.81244200  | 1.26986800  | 0.00012400                  |
| C                                            | -0.57644900 | 1.35310500  | 0.00012500                  |
| H                                            | -1.34064100 | -1.96454500 | -0.00016100                 |
| H                                            | 1.14242000  | -2.12724000 | -0.00016900                 |
| H                                            | 1.42328100  | 2.16578700  | 0.00020000                  |
| H                                            | -1.07413400 | 2.31723700  | 0.00020600                  |
| Br                                           | 3.32015200  | -0.11546200 | 0.00000400                  |
| C                                            | -2.84009700 | 0.35051200  | 0.00001400                  |
| O                                            | -3.41588200 | 1.42105700  | -0.00000200                 |
| O                                            | -3.48643500 | -0.83751500 | 0.00008200                  |
| C                                            | -4.92049600 | -0.75028100 | -0.00017700                 |
| H                                            | -5.27221400 | -0.21820300 | -0.88861200                 |
| H                                            | -5.27644000 | -1.78106200 | -0.00230400                 |
| H                                            | -5.27266500 | -0.22185800 | 0.89028700                  |
| Zero-point correction=                       |             |             | 0.134104 (Hartree/Particle) |
| Thermal correction to Energy=                |             |             | 0.144280                    |
| Thermal correction to Enthalpy=              |             |             | 0.145225                    |
| Thermal correction to Gibbs Free Energy=     |             |             | 0.096599                    |
| Sum of electronic and zero-point Energies=   |             |             | -3031.113741                |
| Sum of electronic and thermal Energies=      |             |             | -3031.103564                |
| Sum of electronic and thermal Enthalpies=    |             |             | -3031.102620                |
| Sum of electronic and thermal Free Energies= |             |             | -3031.151246                |

N1



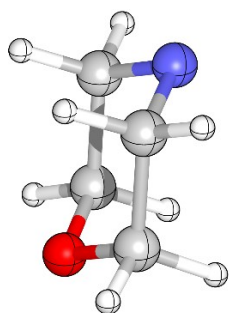

|   |             |             |             |
|---|-------------|-------------|-------------|
| C | 0.01061500  | -0.74653000 | 1.17084100  |
| C | 0.01061500  | 0.80316500  | 1.18073100  |
| C | 0.01061500  | 0.80316500  | -1.18073100 |
| C | 0.01061500  | -0.74653000 | -1.17084100 |
| H | -1.04307200 | 1.13090600  | 1.20907900  |
| H | 0.51584000  | 1.17250700  | 2.08104300  |
| H | 1.04814000  | -1.11226600 | 1.23371100  |
| H | -0.55272500 | -1.13668500 | 2.02368700  |
| H | -1.04307200 | 1.13090600  | -1.20907900 |
| H | 0.51584000  | 1.17250700  | -2.08104300 |
| H | -0.55272500 | -1.13668500 | -2.02368700 |
| H | 1.04814000  | -1.11226600 | -1.23371100 |
| O | -0.62126200 | -1.23426300 | 0.00000000  |
| N | 0.68271100  | 1.29793700  | 0.00000000  |

|                                              |                             |
|----------------------------------------------|-----------------------------|
| Zero-point correction=                       | 0.121691 (Hartree/Particle) |
| Thermal correction to Energy=                | 0.127005                    |
| Thermal correction to Enthalpy=              | 0.127949                    |
| Thermal correction to Gibbs Free Energy=     | 0.092565                    |
| Sum of electronic and zero-point Energies=   | -287.027609                 |
| Sum of electronic and thermal Energies=      | -287.022295                 |
| Sum of electronic and thermal Enthalpies=    | -287.021351                 |
| Sum of electronic and thermal Free Energies= | -287.056735                 |

N2

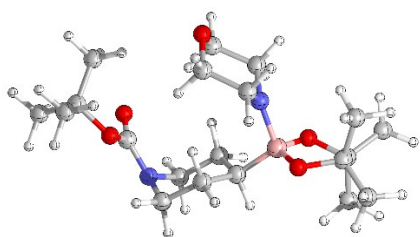

|   |            |             |             |
|---|------------|-------------|-------------|
| B | 1.84365300 | -0.24116900 | 0.06393900  |
| O | 2.77143300 | -0.39480600 | -1.04741300 |
| O | 2.61794700 | -0.03526400 | 1.26938100  |
| C | 4.08961700 | -0.50397200 | -0.49818400 |
| C | 3.96307500 | 0.26406400  | 0.87065900  |
| C | 5.08858500 | 0.10124500  | -1.48436100 |
| H | 6.09853400 | 0.12419400  | -1.05811700 |

|   |             |             |             |
|---|-------------|-------------|-------------|
| H | 5.11754000  | -0.50286400 | -2.39744900 |
| H | 4.80360000  | 1.11800000  | -1.76599300 |
| C | 4.39544800  | -1.99778500 | -0.29865500 |
| H | 5.42809800  | -2.16804400 | 0.02612800  |
| H | 3.71939000  | -2.43386500 | 0.44233500  |
| H | 4.23890900  | -2.51583100 | -1.25009500 |
| C | 4.11754200  | 1.78581300  | 0.70055700  |
| H | 3.51111500  | 2.15623200  | -0.13201100 |
| H | 3.78337300  | 2.28052200  | 1.61873200  |
| H | 5.15816100  | 2.07225300  | 0.51376000  |
| C | 4.90776800  | -0.22042600 | 1.97049300  |
| H | 4.71444400  | -1.26559700 | 2.22110600  |
| H | 5.95559600  | -0.11688200 | 1.66451900  |
| H | 4.75611300  | 0.37529100  | 2.87728800  |
| C | -1.46088600 | -2.15441400 | 1.34094300  |
| C | -0.29232400 | -1.16083300 | 1.33837100  |
| C | 0.71811800  | -1.41400500 | 0.20009000  |
| C | 0.03568900  | -1.72616000 | -1.14791700 |
| C | -1.13069300 | -2.71196100 | -1.01189600 |
| H | -0.74068800 | -0.16681700 | 1.24024600  |
| H | 0.22959900  | -1.17532900 | 2.30322500  |
| H | -1.11194900 | -3.16853400 | 1.57173600  |
| H | -2.22325200 | -1.88548300 | 2.07297900  |
| H | -0.38586700 | -0.81703900 | -1.59276800 |
| H | 0.78509700  | -2.09845400 | -1.85595000 |
| H | -1.66922800 | -2.83864700 | -1.95187900 |
| H | -0.78316700 | -3.69569800 | -0.67423700 |
| H | 1.30167900  | -2.30730600 | 0.47947000  |
| N | -2.06947900 | -2.20545000 | 0.00270400  |
| C | -2.94264600 | -1.23594800 | -0.42469500 |
| O | -3.23809200 | -1.05028900 | -1.59956300 |
| O | -3.43290800 | -0.50746900 | 0.61603000  |
| C | -4.62316400 | 0.33798200  | 0.44382500  |
| C | -4.37494600 | 1.46820300  | -0.56194500 |
| H | -4.26119200 | 1.07329300  | -1.57102200 |
| H | -5.22674900 | 2.15794600  | -0.54180300 |
| H | -3.47652200 | 2.03828900  | -0.30614600 |
| C | -5.80719700 | -0.53958800 | 0.02881800  |
| H | -6.72347200 | 0.06038300  | 0.00222300  |
| H | -5.63909600 | -0.96767300 | -0.96151700 |
| H | -5.94687500 | -1.35248100 | 0.74955900  |
| C | -4.82393700 | 0.90363200  | 1.85119600  |
| H | -5.70714700 | 1.55023900  | 1.87662600  |
| H | -4.96058200 | 0.09427500  | 2.57547000  |

|                                              |             |            |                             |
|----------------------------------------------|-------------|------------|-----------------------------|
| H                                            | -3.95261300 | 1.49431700 | 2.15413700                  |
| C                                            | -0.82742800 | 2.49544400 | 0.60855300                  |
| C                                            | 0.66216700  | 2.10603800 | 0.78047700                  |
| C                                            | 0.75360200  | 1.63680900 | -1.59077900                 |
| C                                            | -0.74834100 | 2.01076900 | -1.68472700                 |
| H                                            | 1.26119700  | 3.02304600 | 0.68130400                  |
| H                                            | 0.87057200  | 1.65658000 | 1.75226100                  |
| H                                            | -1.47244600 | 1.63269600 | 0.82403700                  |
| H                                            | -1.07574900 | 3.30336800 | 1.30206000                  |
| H                                            | 1.33397200  | 2.54859000 | -1.79652300                 |
| H                                            | 1.04574400  | 0.86773000 | -2.30594000                 |
| H                                            | -0.95259200 | 2.46530300 | -2.65730400                 |
| H                                            | -1.37905600 | 1.11746600 | -1.57543300                 |
| O                                            | -1.06888900 | 2.98172200 | -0.69962500                 |
| N                                            | 1.06391200  | 1.18427500 | -0.25558200                 |
| Zero-point correction=                       |             |            | 0.586205 (Hartree/Particle) |
| Thermal correction to Energy=                |             |            | 0.615414                    |
| Thermal correction to Enthalpy=              |             |            | 0.616358                    |
| Thermal correction to Gibbs Free Energy=     |             |            | 0.528551                    |
| Sum of electronic and zero-point Energies=   |             |            | -1295.077681                |
| Sum of electronic and thermal Energies=      |             |            | -1295.048472                |
| Sum of electronic and thermal Enthalpies=    |             |            | -1295.047528                |
| Sum of electronic and thermal Free Energies= |             |            | -1295.135335                |

### N3

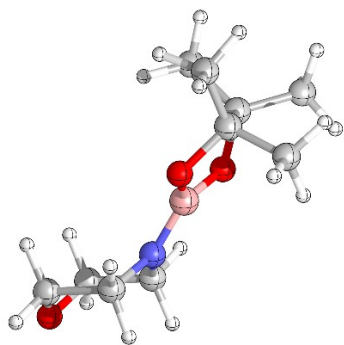

|   |             |             |             |
|---|-------------|-------------|-------------|
| C | -3.33889700 | 1.22430800  | 0.23910800  |
| C | -2.23211300 | 1.08561100  | -0.80890500 |
| C | -2.22352500 | -1.31316200 | -0.38742200 |
| C | -3.32919400 | -1.09471600 | 0.64777300  |
| H | -2.69769400 | 0.99257200  | -1.80262200 |
| H | -1.58749100 | 1.96873200  | -0.81193800 |
| H | -2.88659400 | 1.44254500  | 1.22220600  |
| H | -4.02844300 | 2.03479500  | -0.01871200 |
| H | -2.69083100 | -1.56567000 | -1.35238300 |
| H | -1.57274100 | -2.14081100 | -0.09255500 |
| H | -4.01199000 | -1.94985600 | 0.68428100  |

|                                              |             |             |                             |
|----------------------------------------------|-------------|-------------|-----------------------------|
| H                                            | -2.87530500 | -0.95971200 | 1.64482400                  |
| O                                            | -4.12457300 | 0.03866200  | 0.31334800                  |
| N                                            | -1.42956600 | -0.09811900 | -0.52550700                 |
| B                                            | -0.04501300 | -0.05096200 | -0.28513600                 |
| O                                            | 0.71531200  | 1.09970100  | -0.42529700                 |
| O                                            | 0.69966400  | -1.14994300 | 0.11425900                  |
| C                                            | 2.01499600  | 0.80425600  | 0.14604300                  |
| C                                            | 2.09300500  | -0.76218200 | 0.00487700                  |
| C                                            | 2.88377900  | -1.46926000 | 1.10131600                  |
| H                                            | 3.92592600  | -1.12990200 | 1.10708500                  |
| H                                            | 2.44940400  | -1.28791000 | 2.08682700                  |
| H                                            | 2.87739600  | -2.54932700 | 0.92302200                  |
| C                                            | 2.57865100  | -1.21313000 | -1.37856300                 |
| H                                            | 3.64804000  | -1.02168300 | -1.51528100                 |
| H                                            | 2.40108600  | -2.28788800 | -1.48178100                 |
| H                                            | 2.02690600  | -0.69935200 | -2.17204300                 |
| C                                            | 1.97948200  | 1.27195800  | 1.60673500                  |
| H                                            | 2.95189200  | 1.15362500  | 2.09613800                  |
| H                                            | 1.70461900  | 2.33087400  | 1.63078000                  |
| H                                            | 1.23112500  | 0.71300400  | 2.17758100                  |
| C                                            | 3.07644100  | 1.57553100  | -0.63250400                 |
| H                                            | 4.08140100  | 1.30850900  | -0.28620300                 |
| H                                            | 3.00913100  | 1.37585400  | -1.70416500                 |
| H                                            | 2.93720900  | 2.65060300  | -0.48006200                 |
| Zero-point correction=                       |             |             | 0.309590 (Hartree/Particle) |
| Thermal correction to Energy=                |             |             | 0.324594                    |
| Thermal correction to Enthalpy=              |             |             | 0.325538                    |
| Thermal correction to Gibbs Free Energy=     |             |             | 0.268088                    |
| Sum of electronic and zero-point Energies=   |             |             | -698.245731                 |
| Sum of electronic and thermal Energies=      |             |             | -698.230727                 |
| Sum of electronic and thermal Enthalpies=    |             |             | -698.229783                 |
| Sum of electronic and thermal Free Energies= |             |             | -698.287232                 |

#### N4

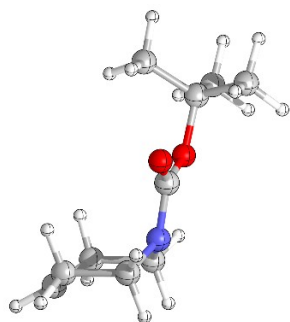

|   |             |            |             |
|---|-------------|------------|-------------|
| C | -1.49092300 | 1.08026500 | -1.02165600 |
| C | -2.18662200 | 1.64482500 | 0.23708600  |
| C | -3.25880300 | 0.71625300 | 0.71809700  |

|                                              |             |             |                             |
|----------------------------------------------|-------------|-------------|-----------------------------|
| C                                            | -2.98211400 | -0.75551000 | 0.73859300                  |
| C                                            | -2.24449000 | -1.20257800 | -0.54297300                 |
| H                                            | -1.40467000 | 1.77322300  | 1.00951600                  |
| H                                            | -2.58653900 | 2.64548800  | 0.02997200                  |
| H                                            | -2.18497500 | 1.10435600  | -1.87087800                 |
| H                                            | -0.60870700 | 1.66089400  | -1.28589400                 |
| H                                            | -2.32936600 | -1.01685600 | 1.59222400                  |
| H                                            | -3.90557400 | -1.33443300 | 0.86409700                  |
| H                                            | -1.87404600 | -2.22342800 | -0.45278300                 |
| H                                            | -2.91985700 | -1.14691300 | -1.40530100                 |
| H                                            | -4.12266200 | 1.11332900  | 1.24341400                  |
| N                                            | -1.10802100 | -0.31789900 | -0.80850100                 |
| C                                            | 0.11114700  | -0.68044000 | -0.28235400                 |
| O                                            | 0.35790300  | -1.79336300 | 0.16068300                  |
| O                                            | 0.99233200  | 0.34889600  | -0.34717000                 |
| C                                            | 2.37103400  | 0.19197300  | 0.13069400                  |
| C                                            | 2.37468100  | -0.12209500 | 1.63001500                  |
| H                                            | 1.94173700  | -1.10403600 | 1.82402500                  |
| H                                            | 3.40353400  | -0.10486100 | 2.00653300                  |
| H                                            | 1.79762400  | 0.63476600  | 2.17304000                  |
| C                                            | 3.09635400  | -0.87824600 | -0.69036800                 |
| H                                            | 4.15533300  | -0.90118800 | -0.40948600                 |
| H                                            | 2.66058800  | -1.86282400 | -0.51703500                 |
| H                                            | 3.02920200  | -0.64266000 | -1.75810600                 |
| C                                            | 2.96798700  | 1.57612700  | -0.13322900                 |
| H                                            | 4.01570000  | 1.60129000  | 0.18416500                  |
| H                                            | 2.92027800  | 1.81778500  | -1.19999400                 |
| H                                            | 2.41716500  | 2.34365700  | 0.42046700                  |
| Zero-point correction=                       |             |             | 0.273478 (Hartree/Particle) |
| Thermal correction to Energy=                |             |             | 0.287410                    |
| Thermal correction to Enthalpy=              |             |             | 0.288354                    |
| Thermal correction to Gibbs Free Energy=     |             |             | 0.232328                    |
| Sum of electronic and zero-point Energies=   |             |             | -596.839234                 |
| Sum of electronic and thermal Energies=      |             |             | -596.825302                 |
| Sum of electronic and thermal Enthalpies=    |             |             | -596.824358                 |
| Sum of electronic and thermal Free Energies= |             |             | -596.880385                 |

### M1

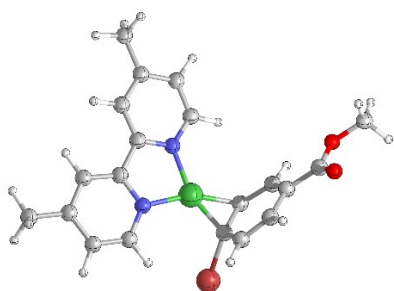

|    |             |             |             |
|----|-------------|-------------|-------------|
| C  | -2.07007100 | 1.66999800  | -0.18429400 |
| C  | -0.16519600 | 2.55060100  | -1.18135100 |
| C  | -0.68878600 | 3.83498400  | -1.14794600 |
| C  | -1.96388600 | 4.05249800  | -0.60612200 |
| C  | -2.64941200 | 2.93706500  | -0.11849900 |
| C  | -2.69340500 | 0.42478000  | 0.30890600  |
| C  | -2.36171100 | -1.85929400 | 0.58817100  |
| C  | -3.63087300 | -2.01598200 | 1.12796200  |
| C  | -4.47295400 | -0.90444700 | 1.27091300  |
| C  | -3.97919700 | 0.32956800  | 0.83984200  |
| H  | 0.82234400  | 2.34131700  | -1.57668100 |
| H  | -0.10426000 | 4.66251300  | -1.53916500 |
| H  | -3.63351100 | 3.06315100  | 0.32096400  |
| H  | -1.69125000 | -2.69706900 | 0.43009900  |
| H  | -3.96210900 | -3.00470100 | 1.43176700  |
| H  | -4.60440600 | 1.21330700  | 0.91637300  |
| N  | -0.83267200 | 1.47871800  | -0.71830800 |
| N  | -1.88466900 | -0.66432000 | 0.19473500  |
| Ni | -0.16792500 | -0.29262000 | -0.51191600 |
| C  | 1.62278100  | -0.60472900 | -1.15004000 |
| C  | 2.63544900  | -1.04845800 | 1.46896900  |
| C  | 2.77294600  | 0.09828700  | -0.67202900 |
| H  | 1.56221800  | -0.73339200 | -2.23279900 |
| C  | 3.23895400  | -0.06290600 | 0.61558500  |
| H  | 3.03485500  | -1.16436200 | 2.47125900  |
| H  | 3.30082400  | 0.76663200  | -1.34648700 |
| Br | 0.47055000  | -3.39397800 | -1.15605400 |
| C  | 1.62013500  | -1.84619500 | 1.02469800  |
| H  | 1.22338200  | -2.63471200 | 1.65785000  |
| C  | 1.03063200  | -1.64521000 | -0.27804400 |
| C  | -5.84928100 | -1.04069300 | 1.86911500  |
| H  | -5.78568400 | -1.26309000 | 2.94171700  |
| H  | -6.43464800 | -0.12382700 | 1.75120100  |
| H  | -6.40287300 | -1.86281300 | 1.40159900  |
| C  | -2.55623300 | 5.43666600  | -0.54439400 |
| H  | -3.57592500 | 5.42367700  | -0.14830000 |
| H  | -1.95286100 | 6.09080600  | 0.09677000  |
| H  | -2.58302600 | 5.89632800  | -1.53939800 |
| C  | 4.38151100  | 0.70164700  | 1.14973100  |
| O  | 4.85380400  | 0.56864300  | 2.26591000  |
| O  | 4.87798800  | 1.61047900  | 0.26043500  |
| C  | 6.00127500  | 2.36045100  | 0.73362300  |
| H  | 6.27732400  | 3.02688600  | -0.08569100 |
| H  | 5.73767100  | 2.93831000  | 1.62511100  |

|                                              |            |            |                             |
|----------------------------------------------|------------|------------|-----------------------------|
| H                                            | 6.83557000 | 1.69810400 | 0.98483100                  |
| Zero-point correction=                       |            |            | 0.349665 (Hartree/Particle) |
| Thermal correction to Energy=                |            |            | 0.375213                    |
| Thermal correction to Enthalpy=              |            |            | 0.376157                    |
| Thermal correction to Gibbs Free Energy=     |            |            | 0.289267                    |
| Sum of electronic and zero-point Energies=   |            |            | -5113.153825                |
| Sum of electronic and thermal Energies=      |            |            | -5113.128277                |
| Sum of electronic and thermal Enthalpies=    |            |            | -5113.127332                |
| Sum of electronic and thermal Free Energies= |            |            | -5113.214223                |

**<sup>3</sup>M1**

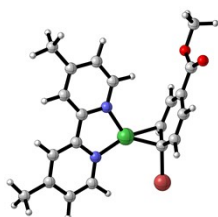

|    |             |             |             |
|----|-------------|-------------|-------------|
| C  | 1.35820200  | -1.59145900 | -1.04801000 |
| C  | 0.66335900  | -2.02724800 | 0.14323900  |
| C  | 1.26496300  | -1.84888300 | 1.42788800  |
| C  | 2.43226200  | -1.13912200 | 1.53405300  |
| C  | 3.10816000  | -0.65387700 | 0.37306900  |
| C  | 2.59805900  | -0.92355500 | -0.88527500 |
| Br | -0.54117700 | -3.57411800 | -0.07263200 |
| H  | 0.76622600  | -2.24936600 | 2.30354200  |
| H  | 1.14965900  | -2.06281900 | -2.00618700 |
| H  | 3.15368500  | -0.62024300 | -1.76626400 |
| H  | 2.87771100  | -0.94290400 | 2.50344100  |
| C  | -2.48540200 | 1.09890200  | -0.01099700 |
| C  | -3.26122700 | -1.11362900 | -0.21769400 |
| C  | -4.55291000 | -0.74883800 | 0.08132800  |
| C  | -4.84502700 | 0.61748200  | 0.35501400  |
| C  | -3.79840400 | 1.51610900  | 0.30875000  |
| C  | -1.33875100 | 1.95860100  | -0.08520200 |
| C  | 0.98126500  | 2.06691000  | -0.44237100 |
| C  | 0.99627600  | 3.43573800  | -0.30443000 |
| C  | -0.22218600 | 4.12311500  | -0.04399900 |
| C  | -1.37160200 | 3.36611200  | 0.05512900  |
| H  | -2.99502900 | -2.14764100 | -0.40857100 |
| H  | -5.33432300 | -1.50169600 | 0.11373900  |
| H  | -3.98390500 | 2.56174200  | 0.53364600  |
| H  | 1.89467000  | 1.51871600  | -0.64104100 |
| H  | 1.93240500  | 3.97788400  | -0.39558400 |
| H  | -2.32143000 | 3.85962500  | 0.23576000  |
| N  | -2.23208500 | -0.23600800 | -0.28795400 |

|                                              |             |             |                             |
|----------------------------------------------|-------------|-------------|-----------------------------|
| N                                            | -0.13599500 | 1.31186700  | -0.33032100                 |
| Ni                                           | -0.37298100 | -0.59713400 | -0.59129200                 |
| C                                            | -0.23288900 | 5.62128000  | 0.10413800                  |
| H                                            | 0.42008600  | 5.93947300  | 0.92737200                  |
| H                                            | 0.14102700  | 6.11062800  | -0.80480300                 |
| H                                            | -1.23918600 | 6.00285500  | 0.30384000                  |
| C                                            | -6.25021400 | 1.04041600  | 0.69219700                  |
| H                                            | -6.62131600 | 0.50685500  | 1.57701300                  |
| H                                            | -6.31374000 | 2.11440300  | 0.89369400                  |
| H                                            | -6.93956600 | 0.80865100  | -0.13038400                 |
| C                                            | 4.35704900  | 0.11579300  | 0.57286800                  |
| O                                            | 4.81392100  | 0.67129400  | -0.58013800                 |
| O                                            | 4.91424900  | 0.26767200  | 1.64394200                  |
| C                                            | 6.02721800  | 1.42713800  | -0.44936900                 |
| H                                            | 5.89002300  | 2.25673500  | 0.25019700                  |
| H                                            | 6.84034000  | 0.79222800  | -0.08556500                 |
| H                                            | 6.24934000  | 1.80009900  | -1.45000800                 |
| Zero-point correction=                       |             |             | 0.348516 (Hartree/Particle) |
| Thermal correction to Energy=                |             |             | 0.374096                    |
| Thermal correction to Enthalpy=              |             |             | 0.375040                    |
| Thermal correction to Gibbs Free Energy=     |             |             | 0.289037                    |
| Sum of electronic and zero-point Energies=   |             |             | -5113.139075                |
| Sum of electronic and thermal Energies=      |             |             | -5113.113495                |
| Sum of electronic and thermal Enthalpies=    |             |             | -5113.112551                |
| Sum of electronic and thermal Free Energies= |             |             | -5113.198555                |

## M2

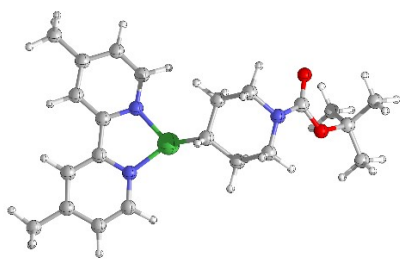

|   |             |             |            |
|---|-------------|-------------|------------|
| C | -3.73187800 | 0.58033400  | 0.20545300 |
| C | -2.80181600 | 2.72778700  | 0.35156900 |
| C | -4.03406900 | 3.32656100  | 0.22841100 |
| C | -5.18951200 | 2.51969100  | 0.05472400 |
| C | -5.01061500 | 1.14708800  | 0.04134400 |
| C | -3.44456600 | -0.83668500 | 0.25360200 |
| C | -1.75139300 | -2.43263700 | 0.53296600 |
| C | -2.64915100 | -3.47470400 | 0.45905000 |
| C | -4.02289700 | -3.19682200 | 0.24427900 |
| C | -4.39761800 | -1.86745300 | 0.14035800 |
| H | -1.89397100 | 3.31546400  | 0.45505200 |



|    |             |             |             |
|----|-------------|-------------|-------------|
| H  | -4.11433100 | 4.40916400  | 0.25489900  |
| H  | -5.87016500 | 0.49751900  | -0.09264900 |
| H  | -0.68850900 | -2.60780900 | 0.66703800  |
| H  | -2.29928900 | -4.49796600 | 0.55621500  |
| H  | -5.44052000 | -1.61764000 | -0.02811300 |
| N  | -2.61892600 | 1.38488200  | 0.34486900  |
| N  | -2.11172900 | -1.13277000 | 0.43333700  |
| Ni | -0.96915800 | 0.40650300  | 0.21635300  |
| C  | -5.02040500 | -4.31974300 | 0.13143000  |
| H  | -6.03736600 | -3.94478500 | -0.01980600 |
| H  | -4.77497700 | -4.98098200 | -0.70938700 |
| H  | -5.01885700 | -4.94052800 | 1.03642800  |
| C  | -6.54544200 | 3.15352100  | -0.11149700 |
| H  | -6.57360900 | 3.79913300  | -0.99879800 |
| H  | -7.33370200 | 2.40162700  | -0.21695700 |
| H  | -6.79362300 | 3.78594200  | 0.75058100  |
| C  | 2.90471200  | 1.28543500  | -1.52836600 |
| C  | 1.66256000  | 1.43883800  | -0.62947800 |
| C  | 0.56301800  | 0.42119800  | -0.98932400 |
| C  | 1.15313900  | -1.00252600 | -1.03279800 |
| C  | 2.41302900  | -1.08897400 | -1.91199500 |
| H  | 1.99339900  | 1.30408900  | 0.41164300  |
| H  | 1.28294800  | 2.46683500  | -0.71005400 |
| H  | 2.63117500  | 1.49708100  | -2.57146800 |
| H  | 3.70830200  | 1.96441900  | -1.24424700 |
| H  | 1.43972200  | -1.33524100 | -0.02256600 |
| H  | 0.40230500  | -1.71459600 | -1.40025600 |
| H  | 2.87993600  | -2.07402100 | -1.87037000 |
| H  | 2.15299200  | -0.86743700 | -2.95620500 |
| H  | 0.22073500  | 0.65900800  | -2.01274300 |
| N  | 3.40051000  | -0.09502900 | -1.47905100 |
| C  | 4.37058800  | -0.50620900 | -0.60216300 |
| O  | 4.61608800  | -1.67882100 | -0.34627500 |
| O  | 5.03773500  | 0.55756100  | -0.07720200 |
| C  | 6.12927400  | 0.36216800  | 0.87742000  |
| C  | 5.60718600  | -0.32914900 | 2.14168400  |
| H  | 5.28889100  | -1.34867800 | 1.92194000  |
| H  | 6.39642200  | -0.35479000 | 2.90166300  |
| H  | 4.75654900  | 0.22904600  | 2.54870400  |
| C  | 7.27731500  | -0.41358700 | 0.22331900  |
| H  | 8.13764400  | -0.44074900 | 0.90182700  |
| H  | 6.97235900  | -1.43450800 | -0.00884600 |
| H  | 7.58521300  | 0.08402700  | -0.70285000 |
| C  | 6.55556600  | 1.79953600  | 1.18700700  |

|                                              |            |            |                             |
|----------------------------------------------|------------|------------|-----------------------------|
| H                                            | 7.37954600 | 1.80252300 | 1.90841800                  |
| H                                            | 6.88731200 | 2.30596900 | 0.27469100                  |
| H                                            | 5.71817600 | 2.36428800 | 1.61009900                  |
| Zero-point correction=                       |            |            | 0.491021 (Hartree/Particle) |
| Thermal correction to Energy=                |            |            | 0.519855                    |
| Thermal correction to Enthalpy=              |            |            | 0.520799                    |
| Thermal correction to Gibbs Free Energy=     |            |            | 0.426982                    |
| Sum of electronic and zero-point Energies=   |            |            | -2678.896942                |
| Sum of electronic and thermal Energies=      |            |            | -2678.868108                |
| Sum of electronic and thermal Enthalpies=    |            |            | -2678.867163                |
| Sum of electronic and thermal Free Energies= |            |            | -2678.960980                |

### M3

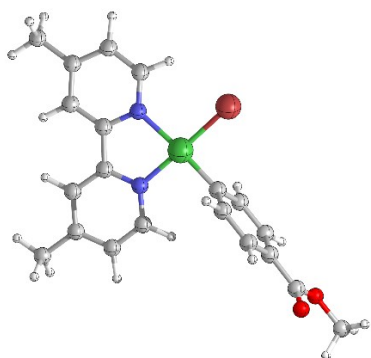

|    |             |             |             |
|----|-------------|-------------|-------------|
| Ni | 0.55849900  | -0.69386600 | 0.00409300  |
| C  | -1.29557900 | -0.51590300 | 0.07205100  |
| C  | -4.08336400 | -0.03880800 | 0.18663000  |
| C  | -1.96103000 | -0.38528100 | 1.30387400  |
| C  | -2.06873500 | -0.43401700 | -1.09884400 |
| C  | -3.44007700 | -0.19405400 | -1.05107700 |
| C  | -3.33023900 | -0.14386200 | 1.36577300  |
| H  | -1.39626600 | -0.47990600 | 2.22881100  |
| H  | -1.58795600 | -0.56681200 | -2.06552000 |
| H  | -4.01966100 | -0.13029100 | -1.96631400 |
| H  | -3.84078800 | -0.03699600 | 2.31833700  |
| N  | 0.85925200  | 1.18819700  | 0.00020600  |
| C  | 1.55361000  | 3.93386900  | -0.01398400 |
| C  | -0.08198000 | 2.15739600  | 0.00837600  |
| C  | 2.16368200  | 1.58676000  | -0.01765700 |
| C  | 2.52577200  | 2.93419400  | -0.02488000 |
| C  | 0.21951100  | 3.51017700  | 0.00179200  |
| N  | 2.54894800  | -0.74497300 | -0.03304800 |
| C  | 5.35116700  | -0.48233400 | -0.05470500 |
| C  | 3.34606400  | -1.82699800 | -0.04678300 |
| C  | 3.13012400  | 0.47838200  | -0.03113500 |
| C  | 4.51779000  | 0.63687500  | -0.04130000 |
| C  | 4.73106800  | -1.73826900 | -0.05830400 |

|                                              |             |             |                             |
|----------------------------------------------|-------------|-------------|-----------------------------|
| H                                            | -1.10613400 | 1.81312700  | 0.02145800                  |
| H                                            | 3.57446600  | 3.20968100  | -0.04014500                 |
| H                                            | -0.59351100 | 4.22995500  | 0.00900800                  |
| H                                            | 2.82013400  | -2.77569100 | -0.04787800                 |
| H                                            | 4.95488500  | 1.62926900  | -0.03783900                 |
| H                                            | 5.32228600  | -2.64913400 | -0.06951400                 |
| Br                                           | 0.26208100  | -2.94158500 | -0.01412200                 |
| C                                            | 6.85214400  | -0.35405500 | -0.06150100                 |
| H                                            | 7.17118300  | 0.69198400  | -0.08794000                 |
| H                                            | 7.28521300  | -0.81913000 | 0.83211900                  |
| H                                            | 7.28263300  | -0.86450500 | -0.93094200                 |
| C                                            | 1.91240000  | 5.39631200  | -0.01378500                 |
| H                                            | 1.42720300  | 5.91775800  | -0.84704700                 |
| H                                            | 1.57180500  | 5.87897800  | 0.91029500                  |
| H                                            | 2.99226600  | 5.54954800  | -0.09762600                 |
| C                                            | -5.53595700 | 0.22674000  | 0.30719500                  |
| O                                            | -6.16103300 | 0.27756400  | -0.90012400                 |
| O                                            | -6.13465900 | 0.38925800  | 1.35547400                  |
| C                                            | -7.57131500 | 0.52069800  | -0.84022300                 |
| H                                            | -7.91354700 | 0.52504600  | -1.87639900                 |
| H                                            | -8.07700600 | -0.26627600 | -0.27250300                 |
| H                                            | -7.78022700 | 1.48303600  | -0.36265800                 |
| Zero-point correction=                       |             |             | 0.351089 (Hartree/Particle) |
| Thermal correction to Energy=                |             |             | 0.376793                    |
| Thermal correction to Enthalpy=              |             |             | 0.377737                    |
| Thermal correction to Gibbs Free Energy=     |             |             | 0.289892                    |
| Sum of electronic and zero-point Energies=   |             |             | -5113.219034                |
| Sum of electronic and thermal Energies=      |             |             | -5113.193330                |
| Sum of electronic and thermal Enthalpies=    |             |             | -5113.192386                |
| Sum of electronic and thermal Free Energies= |             |             | -5113.280231                |

#### M4

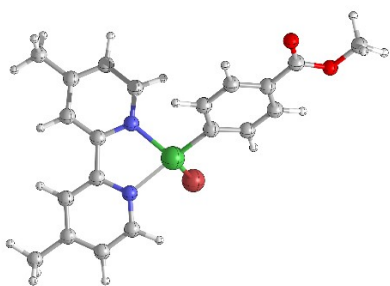

|   |             |             |            |
|---|-------------|-------------|------------|
| C | -3.05759300 | 0.17542600  | 0.58045700 |
| C | -2.76474000 | -2.04134500 | 1.19555900 |
| C | -4.10197700 | -2.17164900 | 1.54430800 |
| C | -4.96245300 | -1.07504800 | 1.39601800 |
| C | -4.41518400 | 0.11190500  | 0.90213900 |

|                                          |             |             |                             |
|------------------------------------------|-------------|-------------|-----------------------------|
| C                                        | -2.38537700 | 1.37490000  | 0.02501500                  |
| C                                        | -0.40952400 | 2.17901100  | -0.89853400                 |
| C                                        | -0.96128300 | 3.43844800  | -1.09425600                 |
| C                                        | -2.28259400 | 3.68330800  | -0.69791400                 |
| C                                        | -2.99289900 | 2.62215100  | -0.12878000                 |
| H                                        | -2.06734000 | -2.86927000 | 1.26829000                  |
| H                                        | -4.47262600 | -3.12145200 | 1.91757900                  |
| H                                        | -5.05555800 | 0.97501900  | 0.75517900                  |
| H                                        | 0.61470900  | 1.94219800  | -1.16543800                 |
| H                                        | -0.36369900 | 4.22250900  | -1.54907600                 |
| H                                        | -4.01733300 | 2.77645100  | 0.19283300                  |
| N                                        | -2.24851700 | -0.89362900 | 0.73903800                  |
| N                                        | -1.10266100 | 1.17240000  | -0.35027700                 |
| Ni                                       | -0.35064000 | -0.66583300 | -0.04038600                 |
| C                                        | 2.53780400  | -1.16985600 | -0.43409400                 |
| C                                        | 3.37958900  | 0.95818000  | 1.15412800                  |
| C                                        | 3.89986400  | -0.94430700 | -0.24879100                 |
| H                                        | 2.21597000  | -1.99323000 | -1.06690300                 |
| C                                        | 4.33239300  | 0.12589400  | 0.55089700                  |
| H                                        | 3.72505700  | 1.78451900  | 1.76885100                  |
| H                                        | 4.63520400  | -1.58741300 | -0.72178200                 |
| Br                                       | -0.68186300 | -2.17968300 | -1.80304200                 |
| C                                        | 2.02253400  | 0.71583200  | 0.95238100                  |
| H                                        | 1.30412000  | 1.38563000  | 1.42783200                  |
| C                                        | 1.55482500  | -0.35478900 | 0.16053900                  |
| C                                        | -2.90266000 | 5.04636300  | -0.86390100                 |
| H                                        | -2.70210200 | 5.44963400  | -1.86236100                 |
| H                                        | -3.98596100 | 5.02044700  | -0.71416800                 |
| H                                        | -2.47933500 | 5.75198800  | -0.13817900                 |
| C                                        | -6.42645500 | -1.18807400 | 1.73290700                  |
| H                                        | -6.91989500 | -0.21178400 | 1.73268700                  |
| H                                        | -6.94002900 | -1.82549000 | 1.00261300                  |
| H                                        | -6.56866800 | -1.64552400 | 2.71823600                  |
| C                                        | 5.76613200  | 0.42635200  | 0.78488800                  |
| O                                        | 6.18768500  | 1.35309200  | 1.45410400                  |
| O                                        | 6.59405500  | -0.45477700 | 0.16402300                  |
| C                                        | 7.99213900  | -0.21008300 | 0.35597100                  |
| H                                        | 8.50724700  | -0.99718300 | -0.19702400                 |
| H                                        | 8.27062000  | 0.77541000  | -0.03001500                 |
| H                                        | 8.25185400  | -0.25388200 | 1.41814500                  |
| Zero-point correction=                   |             |             | 0.350133 (Hartree/Particle) |
| Thermal correction to Energy=            |             |             | 0.376345                    |
| Thermal correction to Enthalpy=          |             |             | 0.377289                    |
| Thermal correction to Gibbs Free Energy= |             |             | 0.287042                    |

Sum of electronic and zero-point Energies= -5113.205099  
 Sum of electronic and thermal Energies= -5113.178887  
 Sum of electronic and thermal Enthalpies= -5113.177943  
 Sum of electronic and thermal Free Energies= -5113.268190

**M5**

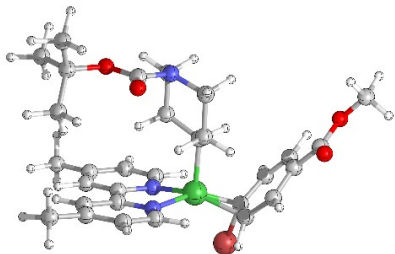

|    |             |             |             |
|----|-------------|-------------|-------------|
| C  | -1.42703400 | -1.68481600 | 1.19209500  |
| C  | -0.60350400 | -0.16753200 | 2.74949800  |
| C  | -1.81631100 | -0.10933900 | 3.41196900  |
| C  | -2.89927200 | -0.87489400 | 2.94252800  |
| C  | -2.67841900 | -1.66977200 | 1.82090500  |
| C  | -1.11688800 | -2.45786200 | -0.01864100 |
| C  | 0.49032600  | -2.88396000 | -1.64433300 |
| C  | -0.35692200 | -3.73476700 | -2.33064400 |
| C  | -1.65416400 | -3.96968300 | -1.83656100 |
| C  | -2.01876900 | -3.31420600 | -0.66472900 |
| H  | 0.24650100  | 0.42505800  | 3.07053600  |
| H  | -1.92584000 | 0.53093800  | 4.28193000  |
| H  | -3.49278000 | -2.26689700 | 1.42421800  |
| H  | 1.49816700  | -2.68291300 | -1.98907600 |
| H  | -0.01494400 | -4.21814000 | -3.24105500 |
| H  | -3.01095100 | -3.46872500 | -0.25385600 |
| N  | -0.39355800 | -0.93179900 | 1.66043300  |
| N  | 0.13435300  | -2.25455900 | -0.51010600 |
| Ni | 1.15472900  | -0.83840500 | 0.41311600  |
| C  | -2.60075300 | -4.89145000 | -2.56034400 |
| H  | -3.55444100 | -4.98882200 | -2.03300100 |
| H  | -2.80925800 | -4.52155700 | -3.57184800 |
| H  | -2.16759500 | -5.89332200 | -2.66743800 |
| C  | -4.24699700 | -0.80106100 | 3.60960300  |
| H  | -4.72466500 | 0.16345100  | 3.39746200  |
| H  | -4.91759900 | -1.59008100 | 3.25588000  |
| H  | -4.15637000 | -0.88846700 | 4.69826900  |
| C  | -1.18891800 | 1.74940300  | -2.22778900 |
| C  | -0.65122900 | 0.48374800  | -1.52997400 |
| C  | 0.52371400  | 0.78909500  | -0.60384900 |
| C  | 0.17581200  | 1.94389800  | 0.33616200  |
| C  | -0.36490100 | 3.17029000  | -0.42467600 |

|    |             |             |             |
|----|-------------|-------------|-------------|
| H  | -1.48737200 | 0.05172800  | -0.95910400 |
| H  | -0.37335100 | -0.25346600 | -2.29364000 |
| H  | -0.41515300 | 2.17505700  | -2.87930700 |
| H  | -2.06596200 | 1.53635000  | -2.83940100 |
| H  | -0.61601400 | 1.64999000  | 1.03653900  |
| H  | 1.04306700  | 2.24448500  | 0.93250800  |
| H  | -0.67102900 | 3.96470600  | 0.25740200  |
| H  | 0.39500900  | 3.56905400  | -1.10802500 |
| H  | 1.39110100  | 1.07927900  | -1.21212500 |
| N  | -1.52688800 | 2.77249300  | -1.23065700 |
| C  | -2.73670400 | 2.75661900  | -0.58139800 |
| O  | -2.96198100 | 3.33099000  | 0.47624900  |
| O  | -3.65737000 | 2.03567300  | -1.28039700 |
| C  | -5.00401500 | 1.83027000  | -0.75231700 |
| C  | -4.93502500 | 1.09245300  | 0.58967000  |
| H  | -4.46521100 | 1.71691700  | 1.35074000  |
| H  | -5.94585100 | 0.82224700  | 0.91642100  |
| H  | -4.34736700 | 0.17465700  | 0.48163900  |
| C  | -5.74580500 | 3.16598600  | -0.64359300 |
| H  | -6.79105500 | 2.98755300  | -0.36577100 |
| H  | -5.27914300 | 3.80604400  | 0.10582800  |
| H  | -5.72966000 | 3.68203900  | -1.60965100 |
| C  | -5.64346200 | 0.93888100  | -1.82024800 |
| H  | -6.67634200 | 0.69907000  | -1.54594800 |
| H  | -5.64825800 | 1.44719700  | -2.78978800 |
| H  | -5.08127400 | 0.00465000  | -1.92409200 |
| C  | 3.03465200  | -1.03004700 | 0.06976600  |
| C  | 3.78747100  | 1.68597300  | 0.13292900  |
| C  | 2.87214000  | -0.26103200 | 1.29604100  |
| C  | 3.71020300  | -0.43980900 | -1.05117500 |
| C  | 4.01835900  | 0.89200000  | -1.03810100 |
| C  | 3.29163300  | 1.09559700  | 1.27806600  |
| H  | 2.85309300  | -0.76850500 | 2.25961000  |
| H  | 3.92896200  | -1.05419800 | -1.91860900 |
| H  | 4.46342300  | 1.35886300  | -1.90939000 |
| H  | 3.22419400  | 1.69495600  | 2.18124000  |
| Br | 3.38323500  | -2.97389200 | 0.32390800  |
| C  | 4.08414800  | 3.13479100  | 0.18292700  |
| O  | 4.62122200  | 3.59490900  | -0.97694300 |
| O  | 3.86494100  | 3.86182400  | 1.13616800  |
| C  | 4.90323800  | 5.00071000  | -0.99734800 |
| H  | 5.31802400  | 5.20297300  | -1.98591300 |
| H  | 3.98903800  | 5.58019200  | -0.83740300 |
| H  | 5.62378500  | 5.26218100  | -0.21676900 |

|                                              |                             |
|----------------------------------------------|-----------------------------|
| Zero-point correction=                       | 0.627476 (Hartree/Particle) |
| Thermal correction to Energy=                | 0.667478                    |
| Thermal correction to Enthalpy=              | 0.668423                    |
| Thermal correction to Gibbs Free Energy=     | 0.551170                    |
| Sum of electronic and zero-point Energies=   | -5710.051588                |
| Sum of electronic and thermal Energies=      | -5710.011586                |
| Sum of electronic and thermal Enthalpies=    | -5710.010642                |
| Sum of electronic and thermal Free Energies= | -5710.127895                |

### M6

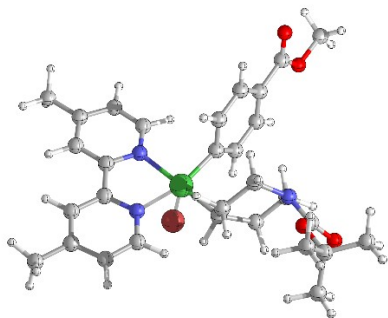

|    |             |             |             |
|----|-------------|-------------|-------------|
| C  | 2.98015800  | -2.26115700 | -0.58147900 |
| C  | 1.07653800  | -3.43069500 | 0.00270500  |
| C  | 1.68478700  | -4.65405800 | -0.24136900 |
| C  | 3.01237000  | -4.68507800 | -0.68099900 |
| C  | 3.65247300  | -3.45665400 | -0.84987700 |
| C  | 3.61884100  | -0.93103600 | -0.69419700 |
| C  | 3.34882400  | 1.34633200  | -0.38113300 |
| C  | 4.66988800  | 1.59934400  | -0.72268200 |
| C  | 5.50785100  | 0.53695800  | -1.07926800 |
| C  | 4.95567000  | -0.74471700 | -1.05645900 |
| H  | 0.05314500  | -3.38401600 | 0.35362000  |
| H  | 1.12649300  | -5.57200300 | -0.08479600 |
| H  | 4.68359700  | -3.44020200 | -1.18359800 |
| H  | 2.67667000  | 2.14230800  | -0.08661100 |
| H  | 5.04044400  | 2.61980100  | -0.70578600 |
| H  | 5.57954700  | -1.59380000 | -1.31143800 |
| N  | 1.69243300  | -2.25320500 | -0.16644700 |
| N  | 2.82336100  | 0.11279800  | -0.37930800 |
| Ni | 0.95010900  | -0.34800100 | 0.30948500  |
| C  | 0.26237900  | 2.35207400  | 1.11280000  |
| C  | -0.17570200 | 3.20139600  | -1.50884100 |
| C  | -0.02633400 | 3.69161200  | 0.85581500  |
| H  | 0.45209700  | 2.02727300  | 2.13090200  |
| C  | -0.25478600 | 4.12651900  | -0.45883300 |
| H  | -0.34545500 | 3.54865500  | -2.52350900 |
| H  | -0.07496000 | 4.40601700  | 1.67097100  |
| Br | 1.85266500  | -0.47868800 | 2.57840400  |

|   |             |             |             |
|---|-------------|-------------|-------------|
| C | 0.11692900  | 1.86630300  | -1.23982300 |
| H | 0.18366100  | 1.16803500  | -2.07325800 |
| C | 0.32547200  | 1.41262800  | 0.07426100  |
| C | 6.94975200  | 0.77128000  | -1.44701100 |
| H | 7.42528200  | -0.13734800 | -1.82775900 |
| H | 7.03743600  | 1.55150400  | -2.21140900 |
| H | 7.51882100  | 1.10941700  | -0.57245700 |
| C | 3.72475100  | -5.98801500 | -0.93265700 |
| H | 4.64047100  | -5.84348700 | -1.51357200 |
| H | 4.00204600  | -6.46070300 | 0.01790400  |
| H | 3.08173100  | -6.69300800 | -1.47028300 |
| C | -0.57034300 | 5.53773700  | -0.79612100 |
| O | -0.74755900 | 5.96085800  | -1.92387400 |
| O | -0.64351000 | 6.33111400  | 0.30188000  |
| C | -0.95474900 | 7.70591500  | 0.03800700  |
| H | -0.98003500 | 8.19345000  | 1.01353100  |
| H | -0.19053300 | 8.16019500  | -0.59986100 |
| H | -1.92424400 | 7.79338700  | -0.46126600 |
| C | -2.54393300 | -0.38456800 | -1.14545200 |
| C | -1.57661200 | -1.41782200 | -0.55159700 |
| C | -0.85995100 | -0.93800700 | 0.72928700  |
| C | -1.78846200 | -0.15403700 | 1.66674800  |
| C | -2.77125600 | 0.79699500  | 0.97139000  |
| H | -2.17678900 | -2.30989300 | -0.30785800 |
| H | -0.86119500 | -1.73562600 | -1.32420300 |
| H | -1.99834700 | 0.48549200  | -1.51937000 |
| H | -3.11091700 | -0.81274600 | -1.97116700 |
| H | -2.39577900 | -0.88475600 | 2.22363900  |
| H | -1.19428300 | 0.38132800  | 2.41298000  |
| H | -3.51829400 | 1.16126900  | 1.67661200  |
| H | -2.25745800 | 1.65624000  | 0.53546800  |
| H | -0.53657800 | -1.80817400 | 1.31302600  |
| N | -3.46518600 | 0.09656600  | -0.11595000 |
| C | -4.63308700 | -0.55418000 | 0.18954300  |
| O | -5.28465200 | -0.35835500 | 1.20647400  |
| O | -4.97870700 | -1.42487100 | -0.79958600 |
| C | -6.20803200 | -2.21389300 | -0.70583400 |
| C | -6.14369500 | -3.14543200 | 0.50940000  |
| H | -6.14845400 | -2.57263600 | 1.43727400  |
| H | -7.00461800 | -3.82350700 | 0.50143500  |
| H | -5.23015700 | -3.74973800 | 0.47012400  |
| C | -7.43189700 | -1.29310600 | -0.66681600 |
| H | -8.34671500 | -1.89337400 | -0.73060100 |
| H | -7.44961500 | -0.71085000 | 0.25495800  |



|                                              |             |             |                             |
|----------------------------------------------|-------------|-------------|-----------------------------|
| H                                            | -7.41111200 | -0.60592300 | -1.51978000                 |
| C                                            | -6.17992100 | -3.02100000 | -2.00625200                 |
| H                                            | -7.05727300 | -3.67373900 | -2.06553800                 |
| H                                            | -6.18251300 | -2.35182700 | -2.87285500                 |
| H                                            | -5.27882800 | -3.64183800 | -2.05192700                 |
| Zero-point correction=                       |             |             | 0.629840 (Hartree/Particle) |
| Thermal correction to Energy=                |             |             | 0.670144                    |
| Thermal correction to Enthalpy=              |             |             | 0.671088                    |
| Thermal correction to Gibbs Free Energy=     |             |             | 0.551301                    |
| Sum of electronic and zero-point Energies=   |             |             | -5710.104081                |
| Sum of electronic and thermal Energies=      |             |             | -5710.063777                |
| Sum of electronic and thermal Enthalpies=    |             |             | -5710.062833                |
| Sum of electronic and thermal Free Energies= |             |             | -5710.182620                |

## M7

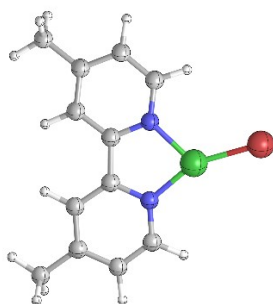

|    |             |             |             |
|----|-------------|-------------|-------------|
| C  | -1.54669500 | -0.34914100 | 0.00001500  |
| C  | -0.92304800 | -2.60065300 | -0.00006700 |
| C  | -2.23966100 | -3.00934000 | 0.00002400  |
| C  | -3.27684600 | -2.05042300 | 0.00010500  |
| C  | -2.89750300 | -0.71191500 | 0.00011600  |
| C  | -1.04347600 | 1.02355400  | 0.00001800  |
| C  | 0.90723800  | 2.30386600  | -0.00003500 |
| C  | 0.18766200  | 3.48620500  | -0.00005600 |
| C  | -1.22030900 | 3.44005700  | -0.00002000 |
| C  | -1.82553800 | 2.18604000  | 0.00000100  |
| H  | -0.10531400 | -3.31415500 | -0.00011600 |
| H  | -2.47005000 | -4.07080100 | 0.00005300  |
| H  | -3.66031800 | 0.06064100  | 0.00022700  |
| H  | 1.99258600  | 2.27925600  | -0.00007400 |
| H  | 0.71109800  | 4.43756600  | -0.00011400 |
| H  | -2.90835600 | 2.11236100  | -0.00001500 |
| N  | -0.54898400 | -1.29602800 | -0.00008200 |
| N  | 0.31678600  | 1.09605600  | 0.00000300  |
| Ni | 1.20243100  | -0.61874700 | -0.00004900 |
| Br | 3.43402900  | -0.73923400 | 0.00004300  |
| C  | -2.03035900 | 4.71075000  | 0.00003000  |

|                                              |             |             |                             |
|----------------------------------------------|-------------|-------------|-----------------------------|
| H                                            | -3.10525500 | 4.50671700  | -0.00087500                 |
| H                                            | -1.80103500 | 5.32060400  | 0.88239800                  |
| H                                            | -1.79969800 | 5.32157300  | -0.88130800                 |
| C                                            | -4.72190400 | -2.47455300 | -0.00003300                 |
| H                                            | -5.39612800 | -1.61254900 | 0.00173400                  |
| H                                            | -4.95464500 | -3.08340800 | -0.88281700                 |
| H                                            | -4.95393200 | -3.08656100 | 0.88073400                  |
| Zero-point correction=                       |             |             | 0.215610 (Hartree/Particle) |
| Thermal correction to Energy=                |             |             | 0.231625                    |
| Thermal correction to Enthalpy=              |             |             | 0.232569                    |
| Thermal correction to Gibbs Free Energy=     |             |             | 0.167655                    |
| Sum of electronic and zero-point Energies=   |             |             | -4653.794836                |
| Sum of electronic and thermal Energies=      |             |             | -4653.778821                |
| Sum of electronic and thermal Enthalpies=    |             |             | -4653.777877                |
| Sum of electronic and thermal Free Energies= |             |             | -4653.842791                |

### M8

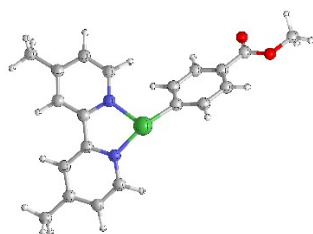

|    |             |             |             |
|----|-------------|-------------|-------------|
| Ni | 0.45829200  | -0.81766500 | -0.49128900 |
| C  | -1.43035400 | -0.65598500 | -0.25246300 |
| C  | -4.21766500 | -0.21241900 | 0.22764400  |
| C  | -1.89743300 | 0.25633100  | 0.72507900  |
| C  | -2.43965900 | -1.33681200 | -0.97087700 |
| C  | -3.79976500 | -1.12753100 | -0.75045600 |
| C  | -3.24830800 | 0.47864000  | 0.97004300  |
| H  | -1.17016200 | 0.81372300  | 1.31504800  |
| H  | -2.15528900 | -2.05876000 | -1.73524700 |
| H  | -4.54325800 | -1.66675700 | -1.32914400 |
| H  | -3.58020300 | 1.18291300  | 1.72774300  |
| N  | 1.24860400  | 0.96342400  | -0.41561400 |
| C  | 2.61285300  | 3.39866100  | -0.12014700 |
| C  | 0.61351500  | 2.13453700  | -0.59405400 |
| C  | 2.57176700  | 0.97671500  | -0.09864800 |
| C  | 3.26650900  | 2.18138100  | 0.06176300  |
| C  | 1.24893300  | 3.35853600  | -0.46183600 |
| N  | 2.25580100  | -1.37355900 | -0.21439700 |
| C  | 4.93946100  | -1.93959200 | 0.48400100  |
| C  | 2.71106700  | -2.64668900 | -0.12319500 |
| C  | 3.14951600  | -0.36298100 | 0.03780800  |
| C  | 4.47565300  | -0.63012300 | 0.39151300  |

|                                              |             |             |                             |
|----------------------------------------------|-------------|-------------|-----------------------------|
| C                                            | 4.01221900  | -2.96593600 | 0.20941500                  |
| H                                            | -0.44241800 | 2.05202200  | -0.82936500                 |
| H                                            | 4.31952100  | 2.17256400  | 0.32421800                  |
| H                                            | 0.68947400  | 4.27620400  | -0.61751500                 |
| H                                            | 1.97335200  | -3.41669100 | -0.32470500                 |
| H                                            | 5.15333300  | 0.19252400  | 0.59748500                  |
| H                                            | 4.31098000  | -4.00894900 | 0.26060900                  |
| C                                            | 6.36059800  | -2.26059900 | 0.86544900                  |
| H                                            | 6.95437000  | -1.35320200 | 1.01233300                  |
| H                                            | 6.39726500  | -2.84140600 | 1.79573800                  |
| H                                            | 6.85037800  | -2.86434500 | 0.09135700                  |
| C                                            | 3.32829000  | 4.71492800  | 0.04303400                  |
| H                                            | 3.26025900  | 5.31359700  | -0.87325900                 |
| H                                            | 2.87671800  | 5.30732100  | 0.84816700                  |
| H                                            | 4.38735400  | 4.57476400  | 0.27932600                  |
| C                                            | -5.64499100 | 0.06208400  | 0.51501500                  |
| O                                            | -6.48760800 | -0.67503000 | -0.25881100                 |
| O                                            | -6.05460200 | 0.85437800  | 1.34512100                  |
| C                                            | -7.88087600 | -0.44775800 | -0.01952900                 |
| H                                            | -8.40981900 | -1.10719100 | -0.70971600                 |
| H                                            | -8.14192900 | -0.68733400 | 1.01594400                  |
| H                                            | -8.14325400 | 0.59746000  | -0.21068800                 |
| Zero-point correction=                       |             |             | 0.348023 (Hartree/Particle) |
| Thermal correction to Energy=                |             |             | 0.371988                    |
| Thermal correction to Enthalpy=              |             |             | 0.372932                    |
| Thermal correction to Gibbs Free Energy=     |             |             | 0.290364                    |
| Sum of electronic and zero-point Energies=   |             |             | -2541.415781                |
| Sum of electronic and thermal Energies=      |             |             | -2541.391816                |
| Sum of electronic and thermal Enthalpies=    |             |             | -2541.390872                |
| Sum of electronic and thermal Free Energies= |             |             | -2541.473440                |

### M9

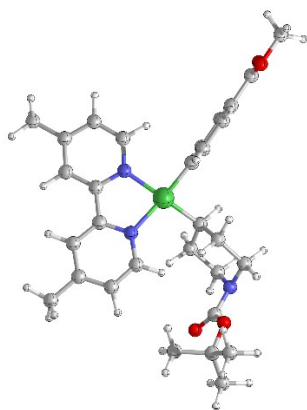

|    |            |             |             |
|----|------------|-------------|-------------|
| Ni | 0.60700900 | 0.45708900  | -0.23686200 |
| C  | 2.15931700 | -0.56601100 | -0.17538300 |
| C  | 4.62655500 | -1.96659100 | 0.09163500  |

|   |             |             |             |
|---|-------------|-------------|-------------|
| C | 2.96069700  | -0.88005800 | -1.29329400 |
| C | 2.63407600  | -1.00387100 | 1.07907000  |
| C | 3.83893600  | -1.69053800 | 1.21953200  |
| C | 4.17139200  | -1.55392100 | -1.17085300 |
| H | 2.62269000  | -0.58729400 | -2.28598800 |
| H | 2.04862000  | -0.79633300 | 1.97357100  |
| H | 4.17805200  | -2.01306700 | 2.19894500  |
| H | 4.78300400  | -1.77781200 | -2.04023400 |
| N | 1.55587400  | 2.15379000  | 0.00997200  |
| C | 2.67428200  | 4.74723500  | -0.11460900 |
| C | 2.88981800  | 2.34319400  | -0.04829500 |
| C | 0.76770600  | 3.26031600  | 0.03511300  |
| C | 1.29516300  | 4.55131600  | -0.03773800 |
| C | 3.47637300  | 3.59888700  | -0.10504500 |
| N | -0.96783600 | 1.63694400  | 0.05787700  |
| C | -2.97541800 | 3.56661100  | 0.58098800  |
| C | -2.25581300 | 1.28984500  | 0.24676300  |
| C | -0.66617100 | 2.95912300  | 0.16368900  |
| C | -1.63926900 | 3.92909400  | 0.41656700  |
| C | -3.27025500 | 2.20066800  | 0.50168900  |
| H | 3.48765900  | 1.44124900  | -0.05409400 |
| H | 0.63228600  | 5.40998700  | -0.04435500 |
| H | 4.55887300  | 3.67683400  | -0.14605800 |
| H | -2.47993300 | 0.23646500  | 0.17540500  |
| H | -1.35391300 | 4.97204400  | 0.50063600  |
| H | -4.28474100 | 1.83831800  | 0.62706500  |
| C | -4.05470100 | 4.58695500  | 0.82985400  |
| H | -3.63886300 | 5.58364500  | 1.00503000  |
| H | -4.73092000 | 4.64949600  | -0.03169200 |
| H | -4.66404500 | 4.31127400  | 1.69801000  |
| C | 3.27675500  | 6.12368900  | -0.22192900 |
| H | 4.12761800  | 6.23580000  | 0.45918500  |
| H | 3.65029700  | 6.30390400  | -1.23790300 |
| H | 2.54654300  | 6.90524400  | 0.00889100  |
| C | 5.92265200  | -2.67685000 | 0.17090200  |
| O | 6.24835400  | -3.03468800 | 1.44363700  |
| O | 6.64560000  | -2.92791000 | -0.77724300 |
| C | 7.49370400  | -3.72921100 | 1.57492800  |
| H | 7.60122100  | -3.94270300 | 2.63977000  |
| H | 7.48375800  | -4.65823800 | 0.99666600  |
| H | 8.32416200  | -3.10966000 | 1.22224800  |
| C | -1.77014800 | -3.10561800 | -0.28824700 |
| C | -0.92143200 | -1.94138700 | 0.24926400  |
| C | -0.27755600 | -1.12607000 | -0.88853600 |

|   |             |             |             |
|---|-------------|-------------|-------------|
| C | -1.24186700 | -0.79388100 | -2.04916100 |
| C | -2.09165000 | -2.01134100 | -2.45427600 |
| H | -1.56998500 | -1.33314600 | 0.89471000  |
| H | -0.12641700 | -2.32823500 | 0.89926400  |
| H | -1.13039200 | -3.82762600 | -0.81091400 |
| H | -2.30150600 | -3.63494200 | 0.50274200  |
| H | -1.93653700 | 0.01826500  | -1.81801500 |
| H | -0.65876700 | -0.45396900 | -2.91542200 |
| H | -2.86679800 | -1.74489700 | -3.17471900 |
| H | -1.45961800 | -2.79280800 | -2.89424100 |
| H | 0.46045800  | -1.80932600 | -1.33171900 |
| N | -2.73766400 | -2.59560900 | -1.27141100 |
| C | -3.94169100 | -2.06879100 | -0.89038800 |
| O | -4.62009300 | -1.31467600 | -1.57974600 |
| O | -4.29272200 | -2.50454400 | 0.35284800  |
| C | -5.57708600 | -2.13830900 | 0.94513900  |
| C | -5.64765600 | -0.62089400 | 1.15011700  |
| H | -5.65728700 | -0.10745100 | 0.18732000  |
| H | -6.55526300 | -0.36068700 | 1.70625600  |
| H | -4.78097300 | -0.28486800 | 1.73133600  |
| C | -6.73168000 | -2.66001000 | 0.08393800  |
| H | -7.68367700 | -2.49046900 | 0.59978300  |
| H | -6.75323500 | -2.15561200 | -0.88279000 |
| H | -6.61702400 | -3.73676800 | -0.08093600 |
| C | -5.53712900 | -2.86070500 | 2.29414000  |
| H | -6.45598100 | -2.66427300 | 2.85685500  |
| H | -5.44208100 | -3.94107000 | 2.14581600  |
| H | -4.68267300 | -2.51833400 | 2.88724000  |

|                                              |                             |
|----------------------------------------------|-----------------------------|
| Zero-point correction=                       | 0.628470 (Hartree/Particle) |
| Thermal correction to Energy=                | 0.666676                    |
| Thermal correction to Enthalpy=              | 0.667620                    |
| Thermal correction to Gibbs Free Energy=     | 0.553438                    |
| Sum of electronic and zero-point Energies=   | -3138.340576                |
| Sum of electronic and thermal Energies=      | -3138.302370                |
| Sum of electronic and thermal Enthalpies=    | -3138.301426                |
| Sum of electronic and thermal Free Energies= | -3138.415607                |

### M10

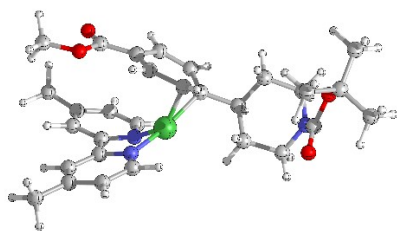

|    |            |            |             |
|----|------------|------------|-------------|
| Ni | 0.69914900 | 0.13501400 | -0.72940700 |
|----|------------|------------|-------------|

|   |             |             |             |
|---|-------------|-------------|-------------|
| C | -0.42836400 | -1.39597900 | -0.25782300 |
| C | 1.76970000  | -1.59182000 | 1.50650400  |
| C | 0.27697500  | -2.65547000 | -0.06772700 |
| C | -0.27975900 | -0.39849300 | 0.80705000  |
| C | 0.92446900  | -0.48643800 | 1.57473300  |
| C | 1.36123300  | -2.74572900 | 0.75278700  |
| H | -0.04026100 | -3.51932500 | -0.65113700 |
| H | -1.09518700 | 0.23705500  | 1.15611300  |
| H | 1.17947600  | 0.33178400  | 2.24083400  |
| H | 1.95645200  | -3.64905700 | 0.82929500  |
| N | 2.33718700  | -0.39271400 | -1.57017000 |
| C | 4.91072600  | -1.44963500 | -1.04493600 |
| C | 2.68022100  | -1.64199300 | -1.94684400 |
| C | 3.32301100  | 0.37862900  | -1.01312500 |
| C | 4.59300100  | -0.12584800 | -0.73609400 |
| C | 3.92906700  | -2.19494800 | -1.71152600 |
| N | 1.54160500  | 1.86834900  | -0.54195700 |
| C | 3.24205800  | 4.06329500  | -0.07654400 |
| C | 1.04425500  | 3.08147400  | -0.23970600 |
| C | 2.89097700  | 1.73589500  | -0.64354800 |
| C | 3.75423600  | 2.80965100  | -0.40864400 |
| C | 1.84489800  | 4.18814600  | -0.00129100 |
| H | 1.88693400  | -2.22246800 | -2.40138100 |
| H | 5.31332500  | 0.49276500  | -0.20954200 |
| H | 4.12025300  | -3.22339700 | -2.00305000 |
| H | -0.03769400 | 3.13891000  | -0.17089700 |
| H | 4.82620000  | 2.67009700  | -0.50648500 |
| H | 1.38601500  | 5.14108700  | 0.24590600  |
| C | 4.14097200  | 5.24331700  | 0.18962900  |
| H | 3.88006100  | 6.09109200  | -0.45491500 |
| H | 4.03923700  | 5.58448400  | 1.22735500  |
| H | 5.19302500  | 4.99687600  | 0.01786500  |
| C | 6.19969800  | -2.07484100 | -0.58772900 |
| H | 6.03657300  | -2.52505200 | 0.40007400  |
| H | 6.53228200  | -2.86542800 | -1.26854900 |
| H | 7.00227600  | -1.33494300 | -0.49620700 |
| C | 3.11991600  | -1.58258300 | 2.07451600  |
| O | 3.45268100  | -0.38299900 | 2.64609600  |
| O | 3.92096800  | -2.50636700 | 2.02064700  |
| C | 4.78424900  | -0.31038700 | 3.15686600  |
| H | 4.87735300  | 0.68285400  | 3.60055600  |
| H | 4.96293300  | -1.08400100 | 3.90995000  |
| H | 5.51681700  | -0.43646500 | 2.35198200  |
| C | -4.23764500 | -2.02477000 | -0.84057000 |

|                                              |             |             |                             |
|----------------------------------------------|-------------|-------------|-----------------------------|
| C                                            | -2.89502700 | -1.98927200 | -0.09918600                 |
| C                                            | -1.75601700 | -1.46950000 | -1.00458900                 |
| C                                            | -2.16263900 | -0.13173000 | -1.65713000                 |
| C                                            | -3.52664600 | -0.23431600 | -2.35227600                 |
| H                                            | -2.99405900 | -1.33021500 | 0.77365000                  |
| H                                            | -2.64114900 | -2.98723000 | 0.27935800                  |
| H                                            | -4.18832300 | -2.73691400 | -1.67569300                 |
| H                                            | -5.05289900 | -2.33244100 | -0.18766700                 |
| H                                            | -2.22671400 | 0.65772000  | -0.89768000                 |
| H                                            | -1.39466500 | 0.17690300  | -2.37985600                 |
| H                                            | -3.84749600 | 0.72762100  | -2.75155700                 |
| H                                            | -3.47821700 | -0.95552700 | -3.17911300                 |
| H                                            | -1.63456300 | -2.19703400 | -1.82421200                 |
| N                                            | -4.54395300 | -0.70662300 | -1.40910800                 |
| C                                            | -5.24022300 | 0.25147700  | -0.71107700                 |
| O                                            | -5.25246600 | 1.43915400  | -1.00699500                 |
| O                                            | -5.92296700 | -0.30058900 | 0.32405100                  |
| C                                            | -6.73724500 | 0.52881200  | 1.21736400                  |
| C                                            | -5.85264800 | 1.55681200  | 1.93060500                  |
| H                                            | -5.45419200 | 2.28473900  | 1.22287500                  |
| H                                            | -6.43947100 | 2.08253100  | 2.69226600                  |
| H                                            | -5.01787000 | 1.05132400  | 2.42909800                  |
| C                                            | -7.87910800 | 1.18610000  | 0.43635900                  |
| H                                            | -8.55102800 | 1.70204100  | 1.13176800                  |
| H                                            | -7.49178300 | 1.90574700  | -0.28569900                 |
| H                                            | -8.45672800 | 0.42356300  | -0.09746100                 |
| C                                            | -7.28124200 | -0.49875500 | 2.21251900                  |
| H                                            | -7.91778300 | -0.00552200 | 2.95461900                  |
| H                                            | -7.87432600 | -1.25853300 | 1.69326500                  |
| H                                            | -6.45917700 | -0.99931800 | 2.73449900                  |
| Zero-point correction=                       |             |             | 0.627966 (Hartree/Particle) |
| Thermal correction to Energy=                |             |             | 0.665563                    |
| Thermal correction to Enthalpy=              |             |             | 0.666507                    |
| Thermal correction to Gibbs Free Energy=     |             |             | 0.555032                    |
| Sum of electronic and zero-point Energies=   |             |             | -3138.334471                |
| Sum of electronic and thermal Energies=      |             |             | -3138.296875                |
| Sum of electronic and thermal Enthalpies=    |             |             | -3138.295930                |
| Sum of electronic and thermal Free Energies= |             |             | -3138.407405                |

**M11**

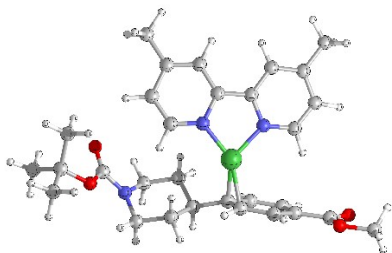

|    |             |             |             |
|----|-------------|-------------|-------------|
| Ni | 0.96447200  | -0.07345800 | 0.27992500  |
| C  | 0.96365000  | -1.92821700 | -0.59872000 |
| C  | 3.73581100  | -2.22581700 | 0.07553900  |
| C  | 1.99048000  | -2.01079400 | -1.60161500 |
| C  | 1.40401400  | -2.02075200 | 0.77315900  |
| C  | 2.78030200  | -2.16878100 | 1.07834700  |
| C  | 3.31834400  | -2.14562100 | -1.28564800 |
| H  | 1.69102600  | -1.98820300 | -2.64628700 |
| H  | 0.69641300  | -2.25047000 | 1.56696300  |
| H  | 3.08438900  | -2.25501300 | 2.11568200  |
| H  | 4.07646700  | -2.20401900 | -2.05928700 |
| N  | 2.25263800  | 1.35173800  | -0.07192800 |
| C  | 3.84023500  | 3.65172100  | -0.50564100 |
| C  | 3.58001200  | 1.25924300  | -0.31437100 |
| C  | 1.68544100  | 2.61546400  | -0.04126300 |
| C  | 2.48642200  | 3.76058700  | -0.25644800 |
| C  | 4.39798500  | 2.34450900  | -0.53418500 |
| N  | -0.29725000 | 1.38754500  | 0.43979700  |
| C  | -1.89294700 | 3.72876600  | 0.43480000  |
| C  | -1.63686600 | 1.33875200  | 0.65205500  |
| C  | 0.27253600  | 2.63449500  | 0.21172500  |
| C  | -0.53246500 | 3.79681100  | 0.21724300  |
| C  | -2.45690500 | 2.44077500  | 0.65793300  |
| H  | 3.97630600  | 0.25212400  | -0.33315000 |
| H  | 2.02886400  | 4.74451800  | -0.22260200 |
| H  | 5.45577800  | 2.19295200  | -0.72624400 |
| H  | -2.05075800 | 0.34706000  | 0.81095400  |
| H  | -0.07098000 | 4.76153200  | 0.03068200  |
| H  | -3.52177000 | 2.32049300  | 0.81369800  |
| C  | -2.77240400 | 4.95030800  | 0.42856800  |
| H  | -3.54932900 | 4.87156300  | -0.34327300 |
| H  | -3.29089500 | 5.06940300  | 1.38924000  |
| H  | -2.19834300 | 5.86302400  | 0.23917200  |
| C  | 4.71159100  | 4.85737900  | -0.74009000 |
| H  | 5.19171100  | 4.81098700  | -1.72639100 |
| H  | 4.13890700  | 5.78881800  | -0.68670100 |
| H  | 5.51822500  | 4.91272700  | 0.00273000  |



|                                            |             |             |                             |
|--------------------------------------------|-------------|-------------|-----------------------------|
| C                                          | 5.18366800  | -2.33450500 | 0.35601700                  |
| O                                          | 5.45524400  | -2.46867200 | 1.67952200                  |
| O                                          | 6.05517700  | -2.29808800 | -0.49528600                 |
| C                                          | 6.84943200  | -2.54866600 | 2.00686600                  |
| H                                          | 6.89059600  | -2.64683200 | 3.09250100                  |
| H                                          | 7.31087900  | -3.41516900 | 1.52408900                  |
| H                                          | 7.37487800  | -1.64562900 | 1.68215500                  |
| C                                          | -2.82944400 | -2.90470900 | -0.36386200                 |
| C                                          | -1.41379900 | -2.59119800 | 0.13285200                  |
| C                                          | -0.46483300 | -2.27980600 | -1.03766800                 |
| C                                          | -1.07941500 | -1.19307800 | -1.94998800                 |
| C                                          | -2.51793400 | -1.52200100 | -2.36456300                 |
| H                                          | -1.46075800 | -1.73015900 | 0.81310300                  |
| H                                          | -1.03688900 | -3.44207100 | 0.71293900                  |
| H                                          | -2.80825400 | -3.81793400 | -0.97727100                 |
| H                                          | -3.51062100 | -3.07528400 | 0.46702900                  |
| H                                          | -1.06984600 | -0.23969900 | -1.41502700                 |
| H                                          | -0.46158700 | -1.05654200 | -2.84566400                 |
| H                                          | -2.97407600 | -0.68817900 | -2.89791900                 |
| H                                          | -2.53339600 | -2.40328200 | -3.02284500                 |
| H                                          | -0.38533000 | -3.20401000 | -1.63298100                 |
| N                                          | -3.33874000 | -1.81580500 | -1.19192800                 |
| C                                          | -4.31134100 | -0.93164600 | -0.80287500                 |
| O                                          | -4.65930400 | 0.03920200  | -1.45962400                 |
| O                                          | -4.83235300 | -1.28712200 | 0.40213700                  |
| C                                          | -6.07042400 | -0.67497800 | 0.89868900                  |
| C                                          | -5.84030600 | 0.80442500  | 1.21679500                  |
| H                                          | -5.61881700 | 1.36214900  | 0.30613100                  |
| H                                          | -6.73659700 | 1.22503900  | 1.68647100                  |
| H                                          | -5.00506200 | 0.91282600  | 1.91727000                  |
| C                                          | -7.20104300 | -0.87894000 | -0.11410900                 |
| H                                          | -8.14797000 | -0.53892700 | 0.31942100                  |
| H                                          | -7.00977200 | -0.31898400 | -1.03061500                 |
| H                                          | -7.29824200 | -1.94197600 | -0.36045300                 |
| C                                          | -6.33815000 | -1.46833800 | 2.17959100                  |
| H                                          | -7.24514300 | -1.09861800 | 2.66894500                  |
| H                                          | -6.47217500 | -2.53116100 | 1.95310400                  |
| H                                          | -5.49957400 | -1.36545100 | 2.87615100                  |
| Zero-point correction=                     |             |             | 0.627852 (Hartree/Particle) |
| Thermal correction to Energy=              |             |             | 0.665783                    |
| Thermal correction to Enthalpy=            |             |             | 0.666728                    |
| Thermal correction to Gibbs Free Energy=   |             |             | 0.554473                    |
| Sum of electronic and zero-point Energies= |             |             | -3138.340211                |
| Sum of electronic and thermal Energies=    |             |             | -3138.302279                |

Sum of electronic and thermal Enthalpies= -3138.301335

Sum of electronic and thermal Free Energies= -3138.413589

**M12**

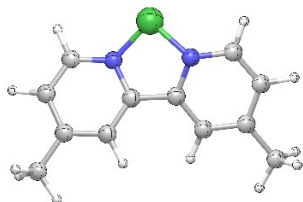

0 1

|    |             |             |             |
|----|-------------|-------------|-------------|
| C  | -0.72467800 | 0.31661700  | 0.06807800  |
| C  | -2.62207400 | -1.02318600 | 0.38232300  |
| C  | -3.46236800 | 0.04504600  | 0.14366500  |
| C  | -2.92846400 | 1.32919200  | -0.09775000 |
| C  | -1.54053600 | 1.43123200  | -0.13860800 |
| C  | 0.72471300  | 0.31663800  | -0.06811000 |
| C  | 2.62209900  | -1.02330300 | -0.38196400 |
| C  | 3.46241200  | 0.04501100  | -0.14372100 |
| C  | 2.92850800  | 1.32922000  | 0.09735700  |
| C  | 1.54058800  | 1.43130900  | 0.13820900  |
| H  | -3.01513400 | -2.00045700 | 0.64042600  |
| H  | -4.53806500 | -0.10598400 | 0.17961800  |
| H  | -1.07710600 | 2.38021300  | -0.39419200 |
| H  | 3.01510600  | -2.00065700 | -0.63981700 |
| H  | 4.53811000  | -0.10598200 | -0.17979400 |
| H  | 1.07719100  | 2.38040400  | 0.39343800  |
| N  | -1.26168600 | -0.92039600 | 0.41739400  |
| N  | 1.26173000  | -0.92045100 | -0.41702900 |
| Ni | -0.00007700 | -2.14215600 | -0.00008900 |
| C  | 3.82807400  | 2.51449800  | 0.33272900  |
| H  | 3.25150100  | 3.43230000  | 0.48686500  |
| H  | 4.46391900  | 2.36649500  | 1.21554900  |
| H  | 4.49977700  | 2.67967700  | -0.51977100 |
| C  | -3.82801600 | 2.51460300  | -0.33246700 |
| H  | -4.49226400 | 2.68587500  | 0.52471700  |
| H  | -3.25123500 | 3.43054900  | -0.49654400 |
| H  | -4.47149700 | 2.36260100  | -1.20899900 |

Zero-point correction= 0.213724 (Hartree/Particle)

Thermal correction to Energy= 0.227603

Thermal correction to Enthalpy= 0.228548

Thermal correction to Gibbs Free Energy= 0.171815

Sum of electronic and zero-point Energies= -2081.917617

Sum of electronic and thermal Energies= -2081.903738  
 Sum of electronic and thermal Enthalpies= -2081.902794  
 Sum of electronic and thermal Free Energies= -2081.959526

**TS1-2**

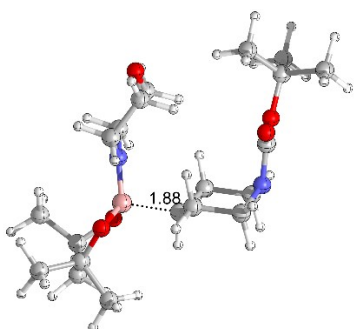

|   |             |             |             |
|---|-------------|-------------|-------------|
| B | 1.93649500  | 0.13524800  | -0.00300200 |
| O | 2.79614300  | -0.25991000 | -1.07863700 |
| O | 2.65896500  | 0.11374100  | 1.23378900  |
| C | 4.07180100  | -0.60339000 | -0.50791200 |
| C | 4.05117100  | 0.16084600  | 0.87038500  |
| C | 5.16377800  | -0.14660000 | -1.47590700 |
| H | 6.15999800  | -0.29284900 | -1.04196000 |
| H | 5.10469400  | -0.73188300 | -2.39967000 |
| H | 5.04478700  | 0.90679800  | -1.73893500 |
| C | 4.14183700  | -2.12893200 | -0.33964700 |
| H | 5.14105900  | -2.45775800 | -0.03365500 |
| H | 3.42357400  | -2.47996200 | 0.40588600  |
| H | 3.90005900  | -2.59932000 | -1.29805200 |
| C | 4.44646200  | 1.64011200  | 0.72616300  |
| H | 3.88080500  | 2.11762600  | -0.08008300 |
| H | 4.20942000  | 2.15757100  | 1.66120300  |
| H | 5.51550900  | 1.76323600  | 0.52208800  |
| C | 4.86907600  | -0.49266700 | 1.98140400  |
| H | 4.49994700  | -1.49568000 | 2.20732500  |
| H | 5.92677600  | -0.56100800 | 1.70127200  |
| H | 4.79574100  | 0.10624000  | 2.89529600  |
| C | -1.39917800 | -2.08828100 | 1.35848500  |
| C | -0.32220800 | -0.98067800 | 1.30603500  |
| C | 0.65693000  | -1.23587200 | 0.17461900  |
| C | 0.02015100  | -1.57513800 | -1.16032800 |
| C | -1.05924800 | -2.66917300 | -0.98322900 |
| H | -0.85871600 | -0.04282800 | 1.15179400  |
| H | 0.20917000  | -0.90743400 | 2.26162400  |
| H | -0.95324700 | -3.05528900 | 1.61950200  |
| H | -2.16599100 | -1.85653300 | 2.09778000  |
| H | -0.49283600 | -0.70945300 | -1.58936100 |
| H | 0.78666000  | -1.89057100 | -1.87532100 |

|                                              |             |             |                             |
|----------------------------------------------|-------------|-------------|-----------------------------|
| H                                            | -1.59311200 | -2.84617700 | -1.91730800                 |
| H                                            | -0.61451300 | -3.61268300 | -0.64718100                 |
| H                                            | 1.38287900  | -2.00230100 | 0.46068200                  |
| N                                            | -2.01990100 | -2.23544900 | 0.03764400                  |
| C                                            | -2.98363200 | -1.34596800 | -0.39806300                 |
| O                                            | -3.31620200 | -1.23081400 | -1.56927300                 |
| O                                            | -3.49816600 | -0.63201400 | 0.63199500                  |
| C                                            | -4.66467400 | 0.24520100  | 0.43678100                  |
| C                                            | -4.35640300 | 1.36560800  | -0.56246300                 |
| H                                            | -4.20260400 | 0.96415300  | -1.56403700                 |
| H                                            | -5.20108800 | 2.06355900  | -0.58573500                 |
| H                                            | -3.46552200 | 1.92907300  | -0.26800000                 |
| C                                            | -5.86442200 | -0.59904000 | -0.00079400                 |
| H                                            | -6.76336300 | 0.02618100  | -0.03496800                 |
| H                                            | -5.69494400 | -1.02677900 | -0.99054400                 |
| H                                            | -6.03595300 | -1.41102400 | 0.71413400                  |
| C                                            | -4.87561600 | 0.81705700  | 1.83981400                  |
| H                                            | -5.73582300 | 1.49432200  | 1.84470600                  |
| H                                            | -5.05813400 | 0.01353700  | 2.56069000                  |
| H                                            | -3.99095900 | 1.37696700  | 2.16134300                  |
| C                                            | -0.81032200 | 2.63194600  | 0.64302000                  |
| C                                            | 0.66557300  | 2.23786000  | 0.78400100                  |
| C                                            | 0.69644300  | 1.74213700  | -1.59922200                 |
| C                                            | -0.79157400 | 2.10724000  | -1.65064600                 |
| H                                            | 1.27129100  | 3.15719000  | 0.71028400                  |
| H                                            | 0.87122900  | 1.78524700  | 1.75620200                  |
| H                                            | -1.46529100 | 1.78299200  | 0.89062000                  |
| H                                            | -1.04743300 | 3.45607600  | 1.32296800                  |
| H                                            | 1.27763800  | 2.63841400  | -1.87475800                 |
| H                                            | 0.94851200  | 0.95512600  | -2.31245000                 |
| H                                            | -1.04757700 | 2.54419600  | -2.62019600                 |
| H                                            | -1.41752900 | 1.21476900  | -1.49810900                 |
| O                                            | -1.10161000 | 3.09569200  | -0.67039400                 |
| N                                            | 1.09471900  | 1.33014200  | -0.26548500                 |
| Zero-point correction=                       |             |             | 0.585214 (Hartree/Particle) |
| Thermal correction to Energy=                |             |             | 0.614272                    |
| Thermal correction to Enthalpy=              |             |             | 0.615217                    |
| Thermal correction to Gibbs Free Energy=     |             |             | 0.527396                    |
| Sum of electronic and zero-point Energies=   |             |             | -1295.077167                |
| Sum of electronic and thermal Energies=      |             |             | -1295.048109                |
| Sum of electronic and thermal Enthalpies=    |             |             | -1295.047165                |
| Sum of electronic and thermal Free Energies= |             |             | -1295.134985                |

**TS2a**

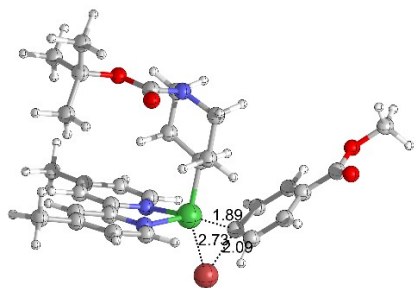

|    |             |             |             |
|----|-------------|-------------|-------------|
| C  | -1.74844300 | -1.73573100 | 0.90326900  |
| C  | -0.98916000 | -0.52194700 | 2.73134500  |
| C  | -2.25819200 | -0.44893900 | 3.27910600  |
| C  | -3.33621900 | -1.04770200 | 2.60510200  |
| C  | -3.05540600 | -1.69591300 | 1.40444500  |
| C  | -1.37471500 | -2.36645400 | -0.37451600 |
| C  | 0.35574600  | -2.74093300 | -1.87563400 |
| C  | -0.48388200 | -3.39140400 | -2.76306000 |
| C  | -1.84504000 | -3.54392500 | -2.44117300 |
| C  | -2.27677200 | -3.01792900 | -1.22710400 |
| H  | -0.13990500 | -0.05404300 | 3.21825600  |
| H  | -2.41117100 | 0.07322300  | 4.21855400  |
| H  | -3.86444100 | -2.16174500 | 0.85193000  |
| H  | 1.41065900  | -2.60194500 | -2.08640300 |
| H  | -0.08750400 | -3.78168800 | -3.69578900 |
| H  | -3.32041600 | -3.11323000 | -0.94698600 |
| N  | -0.71998500 | -1.14861300 | 1.57092500  |
| N  | -0.06698300 | -2.23615800 | -0.70603600 |
| Ni | 0.97537500  | -0.99886600 | 0.48613100  |
| C  | -2.78843200 | -4.24297000 | -3.38534100 |
| H  | -3.79783200 | -4.31625000 | -2.96965100 |
| H  | -2.85362500 | -3.70644100 | -4.33994500 |
| H  | -2.43830900 | -5.25763000 | -3.60992100 |
| C  | -4.73724900 | -0.95501700 | 3.14813400  |
| H  | -5.11793600 | 0.06834500  | 3.04436100  |
| H  | -5.42255800 | -1.62222100 | 2.61673000  |
| H  | -4.76627500 | -1.20852900 | 4.21387100  |
| C  | -0.92154100 | 2.08690300  | -1.96307500 |
| C  | -0.56981000 | 0.69147300  | -1.41025800 |
| C  | 0.58207800  | 0.74686100  | -0.40893400 |
| C  | 0.31087700  | 1.80774300  | 0.65993700  |
| C  | -0.04865800 | 3.17260900  | 0.04385800  |
| H  | -1.47958200 | 0.29832200  | -0.93086600 |
| H  | -0.33615100 | 0.02207100  | -2.24834100 |
| H  | -0.06811900 | 2.49453300  | -2.51955700 |
| H  | -1.78040100 | 2.05847800  | -2.63411500 |
| H  | -0.54461500 | 1.51844900  | 1.28429600  |

|                                            |             |             |                             |
|--------------------------------------------|-------------|-------------|-----------------------------|
| H                                          | 1.17503500  | 1.92059300  | 1.32417900                  |
| H                                          | -0.30644200 | 3.90851300  | 0.80676800                  |
| H                                          | 0.78790900  | 3.56061400  | -0.54969500                 |
| H                                          | 1.50054200  | 1.02167600  | -0.94709900                 |
| N                                          | -1.19971800 | 3.01160000  | -0.85669400                 |
| C                                          | -2.43924400 | 3.06209700  | -0.26949900                 |
| O                                          | -2.65977000 | 3.52082100  | 0.84432400                  |
| O                                          | -3.39440200 | 2.55484000  | -1.09845900                 |
| C                                          | -4.78595400 | 2.45974400  | -0.66477900                 |
| C                                          | -4.88994900 | 1.55096500  | 0.56519400                  |
| H                                          | -4.39229300 | 2.00413100  | 1.42375400                  |
| H                                          | -5.94418300 | 1.37555300  | 0.80882600                  |
| H                                          | -4.41582500 | 0.58589500  | 0.35684400                  |
| C                                          | -5.36554100 | 3.85442500  | -0.40778800                 |
| H                                          | -6.44031500 | 3.77701800  | -0.20657000                 |
| H                                          | -4.87427000 | 4.32646800  | 0.44356900                  |
| H                                          | -5.22575600 | 4.48585600  | -1.29183200                 |
| C                                          | -5.46270600 | 1.80540600  | -1.87207300                 |
| H                                          | -6.53155600 | 1.66511800  | -1.67861900                 |
| H                                          | -5.34772300 | 2.43326400  | -2.76142400                 |
| H                                          | -5.01157300 | 0.82912500  | -2.07962500                 |
| C                                          | 2.85153300  | -1.11265200 | 0.24694000                  |
| C                                          | 4.24844800  | 1.31630600  | 0.10592000                  |
| C                                          | 3.00627900  | -0.30627600 | 1.42505900                  |
| C                                          | 3.60957300  | -0.79846600 | -0.91954500                 |
| C                                          | 4.24160600  | 0.41791200  | -0.99900700                 |
| C                                          | 3.66395100  | 0.91931700  | 1.31124500                  |
| H                                          | 2.73407900  | -0.68355000 | 2.40552800                  |
| H                                          | 3.60807200  | -1.48351600 | -1.76087800                 |
| H                                          | 4.74783100  | 0.70693600  | -1.91369400                 |
| H                                          | 3.76087500  | 1.57490900  | 2.17131800                  |
| Br                                         | 2.66745100  | -3.13033400 | 0.75268800                  |
| C                                          | 4.89895700  | 2.63714100  | 0.05529300                  |
| O                                          | 5.45556700  | 2.89799600  | -1.16063500                 |
| O                                          | 4.94318000  | 3.43544400  | 0.97670800                  |
| C                                          | 6.09273400  | 4.17627000  | -1.26990300                 |
| H                                          | 6.47492100  | 4.22854800  | -2.29069700                 |
| H                                          | 5.37742600  | 4.98367600  | -1.08576000                 |
| H                                          | 6.91112900  | 4.26532500  | -0.54891400                 |
| Zero-point correction=                     |             |             | 0.626970 (Hartree/Particle) |
| Thermal correction to Energy=              |             |             | 0.666511                    |
| Thermal correction to Enthalpy=            |             |             | 0.667455                    |
| Thermal correction to Gibbs Free Energy=   |             |             | 0.551928                    |
| Sum of electronic and zero-point Energies= |             |             | -5710.046438                |

Sum of electronic and thermal Energies= -5710.006896  
 Sum of electronic and thermal Enthalpies= -5710.005952  
 Sum of electronic and thermal Free Energies= -5710.121479

**TS2b**

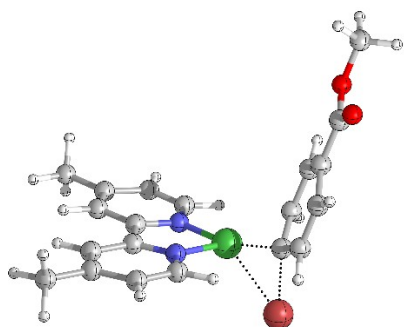

|    |             |             |             |
|----|-------------|-------------|-------------|
| C  | -2.53935300 | 0.86717400  | 0.37785700  |
| C  | -1.64412600 | 2.49237600  | -1.02378100 |
| C  | -2.65173100 | 3.38763300  | -0.70826900 |
| C  | -3.65784900 | 3.01110600  | 0.19795300  |
| C  | -3.58243900 | 1.72764800  | 0.73542400  |
| C  | -2.35718100 | -0.49701000 | 0.89562300  |
| C  | -0.94970800 | -2.34218800 | 0.90574100  |
| C  | -1.79012300 | -3.03544300 | 1.76032800  |
| C  | -2.97931900 | -2.43651600 | 2.20912000  |
| C  | -3.24677900 | -1.14543600 | 1.75773300  |
| H  | -0.85305300 | 2.74719800  | -1.72098700 |
| H  | -2.65739500 | 4.37319300  | -1.16454800 |
| H  | -4.33738700 | 1.39914400  | 1.44224900  |
| H  | -0.01773200 | -2.76869900 | 0.55253300  |
| H  | -1.52171200 | -4.03896800 | 2.07799200  |
| H  | -4.15636100 | -0.64579700 | 2.07541700  |
| N  | -1.57056000 | 1.25343000  | -0.49865700 |
| N  | -1.20930100 | -1.09523400 | 0.46767800  |
| Ni | -0.19055200 | -0.04501800 | -0.78934700 |
| C  | 1.74563500  | 0.63619700  | -1.13611900 |
| C  | 3.23075600  | -1.26667200 | 0.35523500  |
| C  | 2.77541600  | 1.04895200  | -0.26216100 |
| H  | 1.56486500  | 1.25234500  | -2.01377700 |
| C  | 3.47567800  | 0.12922700  | 0.51419900  |
| H  | 3.84464300  | -1.95700000 | 0.92530700  |
| H  | 3.08307600  | 2.09012100  | -0.24980800 |
| Br | 0.31782400  | -1.28311600 | -2.94848100 |
| C  | 2.24245500  | -1.72982900 | -0.48053600 |
| H  | 2.05938300  | -2.79131100 | -0.61301800 |
| C  | 1.39245300  | -0.77271500 | -1.08740400 |
| C  | -3.91006000 | -3.16154000 | 3.14643600  |
| H  | -3.43828200 | -3.31433100 | 4.12527700  |

|                                              |             |             |                             |
|----------------------------------------------|-------------|-------------|-----------------------------|
| H                                            | -4.83885100 | -2.60509000 | 3.30491300                  |
| H                                            | -4.16927800 | -4.15267200 | 2.75604700                  |
| C                                            | -4.76190300 | 3.96632700  | 0.57094800                  |
| H                                            | -5.49970200 | 3.49554800  | 1.22751600                  |
| H                                            | -4.35982200 | 4.84497100  | 1.09040500                  |
| H                                            | -5.28409300 | 4.33111600  | -0.32155000                 |
| C                                            | 4.55075600  | 0.52998700  | 1.44246200                  |
| O                                            | 5.22683500  | -0.23878000 | 2.10517100                  |
| O                                            | 4.72174900  | 1.88036500  | 1.50238600                  |
| C                                            | 5.75973200  | 2.31689100  | 2.38688700                  |
| H                                            | 5.76770000  | 3.40597100  | 2.31671800                  |
| H                                            | 5.55420800  | 2.00046500  | 3.41415900                  |
| H                                            | 6.72791900  | 1.90629300  | 2.08404000                  |
| Zero-point correction=                       |             |             | 0.348673 (Hartree/Particle) |
| Thermal correction to Energy=                |             |             | 0.373765                    |
| Thermal correction to Enthalpy=              |             |             | 0.374709                    |
| Thermal correction to Gibbs Free Energy=     |             |             | 0.287177                    |
| Sum of electronic and zero-point Energies=   |             |             | -5113.143531                |
| Sum of electronic and thermal Energies=      |             |             | -5113.118440                |
| Sum of electronic and thermal Enthalpies=    |             |             | -5113.117495                |
| Sum of electronic and thermal Free Energies= |             |             | -5113.205027                |

### TS2c

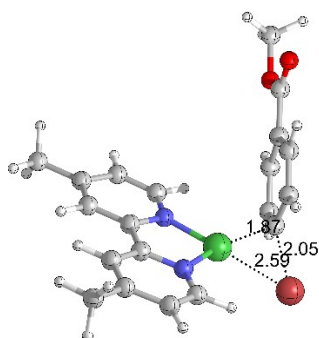

|    |             |             |             |
|----|-------------|-------------|-------------|
| C  | 1.75432200  | -1.19668700 | -1.11554700 |
| C  | 0.89312500  | -1.83987700 | -0.17766900 |
| C  | 1.24637600  | -1.95248200 | 1.18975100  |
| C  | 2.32923000  | -1.23343900 | 1.64208700  |
| C  | 3.13650900  | -0.47736900 | 0.75058300  |
| C  | 2.85917200  | -0.49107500 | -0.61524700 |
| Br | -0.31836600 | -3.25178700 | -1.03305800 |
| H  | 0.61166800  | -2.51524700 | 1.86443300  |
| H  | 1.66732300  | -1.37110600 | -2.18368500 |
| H  | 3.52447300  | 0.02193400  | -1.30105700 |
| H  | 2.58880800  | -1.22757200 | 2.69568400  |
| C  | -2.47927500 | 0.84730800  | 0.26452000  |
| C  | -2.94755000 | -1.43558100 | 0.57148300  |



|                                              |             |             |                             |
|----------------------------------------------|-------------|-------------|-----------------------------|
| C                                            | -4.09651200 | -1.16526700 | 1.28013200                  |
| C                                            | -4.47064200 | 0.18928200  | 1.50435600                  |
| C                                            | -3.64860800 | 1.17253100  | 0.99243500                  |
| C                                            | -1.56792300 | 1.80055800  | -0.30017300                 |
| C                                            | 0.48049900  | 2.08680800  | -1.42442000                 |
| C                                            | 0.34700900  | 3.45524500  | -1.44458300                 |
| C                                            | -0.81639500 | 4.04663900  | -0.87185900                 |
| C                                            | -1.75136300 | 3.20358400  | -0.30646400                 |
| H                                            | -2.62595900 | -2.45484000 | 0.38439900                  |
| H                                            | -4.70417000 | -1.98058000 | 1.66035800                  |
| H                                            | -3.89546300 | 2.21603500  | 1.16171800                  |
| H                                            | 1.35675900  | 1.59916800  | -1.84047300                 |
| H                                            | 1.12337600  | 4.07136400  | -1.88738500                 |
| H                                            | -2.64951900 | 3.62383600  | 0.13559300                  |
| N                                            | -2.14104200 | -0.48154500 | 0.05752900                  |
| N                                            | -0.43435000 | 1.25165500  | -0.88256300                 |
| Ni                                           | -0.41969000 | -0.67388600 | -0.81241700                 |
| C                                            | -0.99623800 | 5.54123600  | -0.89684400                 |
| H                                            | -0.16429100 | 6.04696500  | -0.38919600                 |
| H                                            | -1.01579800 | 5.91947100  | -1.92750200                 |
| H                                            | -1.92658400 | 5.84654300  | -0.40759300                 |
| C                                            | -5.71833800 | 0.51331400  | 2.28278800                  |
| H                                            | -5.67365500 | 0.08978800  | 3.29470400                  |
| H                                            | -5.87063800 | 1.59333300  | 2.37497300                  |
| H                                            | -6.60635400 | 0.08591600  | 1.79885400                  |
| C                                            | 4.28200400  | 0.26622900  | 1.32213200                  |
| O                                            | 4.97563100  | 0.95851500  | 0.38239100                  |
| O                                            | 4.58250700  | 0.27396900  | 2.50227100                  |
| C                                            | 6.09620200  | 1.70183100  | 0.88282900                  |
| H                                            | 5.76917300  | 2.44558400  | 1.61534900                  |
| H                                            | 6.82037200  | 1.03479400  | 1.35964600                  |
| H                                            | 6.53762900  | 2.18859600  | 0.01212000                  |
| Zero-point correction=                       |             |             | 0.347484 (Hartree/Particle) |
| Thermal correction to Energy=                |             |             | 0.372613                    |
| Thermal correction to Enthalpy=              |             |             | 0.373557                    |
| Thermal correction to Gibbs Free Energy=     |             |             | 0.288467                    |
| Sum of electronic and zero-point Energies=   |             |             | -5113.136140                |
| Sum of electronic and thermal Energies=      |             |             | -5113.111011                |
| Sum of electronic and thermal Enthalpies=    |             |             | -5113.110067                |
| Sum of electronic and thermal Free Energies= |             |             | -5113.195156                |

**TS3a**

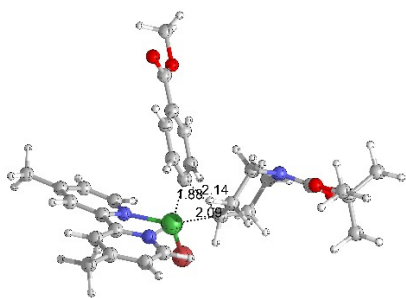

|    |             |             |             |
|----|-------------|-------------|-------------|
| C  | 2.53347200  | -2.24509900 | -1.00096400 |
| C  | 0.42432300  | -3.19945400 | -0.98381900 |
| C  | 0.76810800  | -4.10727000 | -1.97515600 |
| C  | 2.06050300  | -4.07746500 | -2.51671200 |
| C  | 2.94540700  | -3.12813200 | -2.00326500 |
| C  | 3.42242200  | -1.24563500 | -0.36739200 |
| C  | 3.60651200  | 0.27250500  | 1.37427900  |
| C  | 4.88692700  | 0.63598900  | 0.98021700  |
| C  | 5.46267400  | 0.03433100  | -0.14756300 |
| C  | 4.70443400  | -0.92489300 | -0.82210200 |
| H  | -0.56668800 | -3.20025300 | -0.54291600 |
| H  | 0.03707300  | -4.83304100 | -2.31852500 |
| H  | 3.96365500  | -3.09145500 | -2.37501500 |
| H  | 3.11126800  | 0.71672600  | 2.23121600  |
| H  | 5.43134900  | 1.38713000  | 1.54476800  |
| H  | 5.11151900  | -1.40470200 | -1.70577000 |
| N  | 1.27200700  | -2.27426400 | -0.50930900 |
| N  | 2.88978800  | -0.64421100 | 0.71376100  |
| Ni | 0.90771100  | -0.92146400 | 1.01200300  |
| C  | 0.51747300  | 1.83756000  | 1.03142100  |
| C  | 0.91909600  | 2.12944600  | -1.70800800 |
| C  | 0.83203600  | 3.08838000  | 0.50897700  |
| H  | 0.37275400  | 1.73014300  | 2.10238100  |
| C  | 1.03512500  | 3.25029400  | -0.87025600 |
| H  | 1.08887200  | 2.25837900  | -2.77276500 |
| H  | 0.92310400  | 3.94558500  | 1.16778700  |
| Br | 1.01488700  | -1.22297100 | 3.37419300  |
| C  | 0.60271700  | 0.88548500  | -1.17975600 |
| H  | 0.53457500  | 0.03196500  | -1.84818600 |
| C  | 0.40616700  | 0.70125700  | 0.20429500  |
| C  | 6.84396500  | 0.41979300  | -0.61037900 |
| H  | 7.14728500  | -0.14366100 | -1.49767300 |
| H  | 6.88755600  | 1.48770400  | -0.85476000 |
| H  | 7.58373200  | 0.23800800  | 0.17817600  |
| C  | 2.47081300  | -5.03986000 | -3.60053700 |
| H  | 3.53141800  | -4.94248200 | -3.84932500 |

|                                          |             |             |                             |
|------------------------------------------|-------------|-------------|-----------------------------|
| H                                        | 2.28459200  | -6.07567400 | -3.29441200                 |
| H                                        | 1.89057700  | -4.86370900 | -4.51443400                 |
| C                                        | 1.37708500  | 4.55171400  | -1.48815400                 |
| O                                        | 1.58712000  | 4.72632200  | -2.67557500                 |
| O                                        | 1.43801600  | 5.56003400  | -0.58027300                 |
| C                                        | 1.75820900  | 6.84733900  | -1.12402400                 |
| H                                        | 1.75742800  | 7.53308400  | -0.27555500                 |
| H                                        | 2.74104500  | 6.83152400  | -1.60489500                 |
| H                                        | 1.01219000  | 7.15090200  | -1.86446000                 |
| C                                        | -2.68140200 | 0.51058300  | -0.94318100                 |
| C                                        | -1.92161900 | -0.76379700 | -0.54420800                 |
| C                                        | -1.15282400 | -0.63995900 | 0.77847400                  |
| C                                        | -1.95003600 | 0.09651000  | 1.86136600                  |
| C                                        | -2.73045800 | 1.31794700  | 1.35613700                  |
| H                                        | -2.67358300 | -1.56085600 | -0.42984900                 |
| H                                        | -1.26302700 | -1.07359000 | -1.36215700                 |
| H                                        | -1.98072000 | 1.31521600  | -1.18475000                 |
| H                                        | -3.30631200 | 0.33083200  | -1.81663800                 |
| H                                        | -2.68334000 | -0.61322400 | 2.27224100                  |
| H                                        | -1.29632900 | 0.36431100  | 2.69537800                  |
| H                                        | -3.41310200 | 1.67946900  | 2.12503200                  |
| H                                        | -2.05397600 | 2.13161600  | 1.07854600                  |
| H                                        | -0.98392200 | -1.66137700 | 1.15908600                  |
| N                                        | -3.51497900 | 0.96946700  | 0.16808100                  |
| C                                        | -4.80804500 | 0.54985700  | 0.35251500                  |
| O                                        | -5.43863400 | 0.70323300  | 1.38956800                  |
| O                                        | -5.29551000 | -0.03311600 | -0.77673900                 |
| C                                        | -6.67986000 | -0.50754500 | -0.83832000                 |
| C                                        | -6.89814400 | -1.62766500 | 0.18404800                  |
| H                                        | -6.81551000 | -1.24503500 | 1.20178800                  |
| H                                        | -7.89286700 | -2.06608200 | 0.04514800                  |
| H                                        | -6.15186400 | -2.41729700 | 0.04027400                  |
| C                                        | -7.65164000 | 0.65963200  | -0.63744100                 |
| H                                        | -8.67809100 | 0.31903700  | -0.81515400                 |
| H                                        | -7.57713100 | 1.05594400  | 0.37571100                  |
| H                                        | -7.42744500 | 1.46114200  | -1.34984500                 |
| C                                        | -6.77627500 | -1.05150800 | -2.26585900                 |
| H                                        | -7.77835100 | -1.45248500 | -2.45105300                 |
| H                                        | -6.57782400 | -0.25720000 | -2.99289300                 |
| H                                        | -6.04549900 | -1.85236100 | -2.42074800                 |
| Zero-point correction=                   |             |             | 0.628203 (Hartree/Particle) |
| Thermal correction to Energy=            |             |             | 0.668146                    |
| Thermal correction to Enthalpy=          |             |             | 0.669090                    |
| Thermal correction to Gibbs Free Energy= |             |             | 0.549795                    |

Sum of electronic and zero-point Energies= -5710.091991  
 Sum of electronic and thermal Energies= -5710.052047  
 Sum of electronic and thermal Enthalpies= -5710.051103  
 Sum of electronic and thermal Free Energies= -5710.170398

**TS3b**

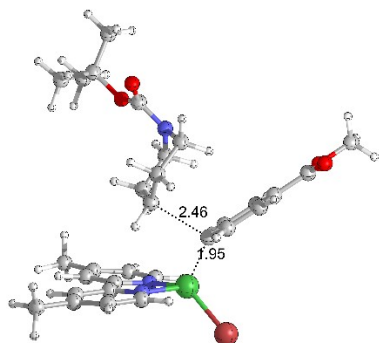

|    |             |             |             |
|----|-------------|-------------|-------------|
| Ni | -2.50712600 | 0.32331500  | 0.33554600  |
| C  | -0.89267700 | 1.36624300  | -0.00956800 |
| C  | 0.28396500  | 3.96476800  | -0.08735600 |
| C  | -0.91473700 | 2.16647200  | -1.17976800 |
| C  | -0.26638100 | 1.94166100  | 1.12038500  |
| C  | 0.30743500  | 3.20974200  | 1.09544600  |
| C  | -0.34258800 | 3.42802700  | -1.22757700 |
| H  | -1.40809600 | 1.78347600  | -2.07192700 |
| H  | -0.20633200 | 1.36938600  | 2.04489900  |
| H  | 0.77954200  | 3.62126100  | 1.98183000  |
| H  | -0.36941700 | 4.02759400  | -2.13257600 |
| N  | -1.91653700 | -1.15607400 | 1.56803400  |
| C  | -0.83646900 | -3.32784000 | 2.97990100  |
| C  | -1.49528700 | -1.01464300 | 2.83381100  |
| C  | -1.84493700 | -2.38012300 | 0.99066100  |
| C  | -1.30133600 | -3.47187200 | 1.67119000  |
| C  | -0.95689300 | -2.06110600 | 3.56890300  |
| N  | -2.73573600 | -1.23674400 | -0.89371900 |
| C  | -3.02319200 | -3.55016600 | -2.43947200 |
| C  | -3.23351000 | -1.16717600 | -2.13595100 |
| C  | -2.37803600 | -2.43881800 | -0.38878100 |
| C  | -2.51658100 | -3.60897900 | -1.13966700 |
| C  | -3.38413000 | -2.28923200 | -2.93784400 |
| H  | -1.59674200 | -0.01872300 | 3.25227700  |
| H  | -1.23035400 | -4.43752100 | 1.18221300  |
| H  | -0.62932100 | -1.88961500 | 4.58971500  |
| H  | -3.51597500 | -0.17312800 | -2.46700900 |
| H  | -2.23832300 | -4.56836700 | -0.71689900 |
| H  | -3.78685700 | -2.18494600 | -3.94072200 |
| Br | -4.48940600 | 1.51544800  | 0.23730400  |

|   |             |             |             |
|---|-------------|-------------|-------------|
| C | -3.18862100 | -4.78923100 | -3.28039200 |
| H | -4.24311900 | -4.94578700 | -3.53702800 |
| H | -2.63720200 | -4.69619300 | -4.22326800 |
| H | -2.82928200 | -5.68304500 | -2.76237000 |
| C | -0.21216300 | -4.47705700 | 3.72705600  |
| H | 0.87690400  | -4.35351700 | 3.77905200  |
| H | -0.58255300 | -4.52671900 | 4.75665000  |
| H | -0.41679000 | -5.43537000 | 3.24079800  |
| C | 2.58343100  | 0.14273100  | 0.75289100  |
| C | 1.41148400  | -0.83582500 | 0.55601000  |
| C | 0.57059700  | -0.50279200 | -0.64778400 |
| C | 1.28579800  | -0.02561900 | -1.88241000 |
| C | 2.42752200  | 0.94637400  | -1.54798400 |
| H | 1.84033100  | -1.84863700 | 0.43503400  |
| H | 0.79899200  | -0.86843200 | 1.46454700  |
| H | 2.20478000  | 1.11433800  | 1.08085300  |
| H | 3.28460900  | -0.22535700 | 1.50024100  |
| H | 1.73063600  | -0.88940100 | -2.40986300 |
| H | 0.58384100  | 0.44120200  | -2.58273800 |
| H | 3.03642100  | 1.16181100  | -2.42549600 |
| H | 2.02267700  | 1.88450000  | -1.15692300 |
| H | -0.26500900 | -1.16620100 | -0.82904400 |
| N | 3.28735400  | 0.35958500  | -0.51333600 |
| C | 4.31782200  | -0.44388100 | -0.93118300 |
| O | 4.72874700  | -0.49133400 | -2.08296000 |
| O | 4.83147800  | -1.15746000 | 0.10829500  |
| C | 5.97021600  | -2.05585000 | -0.08895700 |
| C | 5.59422900  | -3.17719100 | -1.06370900 |
| H | 5.42077300  | -2.77939800 | -2.06409400 |
| H | 6.40243100  | -3.91602600 | -1.10596700 |
| H | 4.68445700  | -3.68243400 | -0.71950200 |
| C | 7.19689300  | -1.26627600 | -0.55667100 |
| H | 8.07309100  | -1.92424600 | -0.57818100 |
| H | 7.03536400  | -0.85366700 | -1.55305500 |
| H | 7.40061000  | -0.44482100 | 0.13878600  |
| C | 6.19247800  | -2.61705900 | 1.31783100  |
| H | 7.02934700  | -3.32339100 | 1.31556500  |
| H | 6.41811600  | -1.80933900 | 2.02167100  |
| H | 5.29546200  | -3.13929700 | 1.66765700  |
| C | 0.89370600  | 5.30976500  | -0.19271400 |
| O | 0.90971400  | 5.99269600  | -1.20108300 |
| O | 1.45604500  | 5.72208800  | 0.97511200  |
| C | 2.06246700  | 7.01949000  | 0.92729400  |
| H | 2.45898600  | 7.19601500  | 1.92843600  |

|                                              |            |            |                             |
|----------------------------------------------|------------|------------|-----------------------------|
| H                                            | 2.86663200 | 7.04465000 | 0.18557700                  |
| H                                            | 1.32366300 | 7.78331800 | 0.66658500                  |
| Zero-point correction=                       |            |            | 0.625737 (Hartree/Particle) |
| Thermal correction to Energy=                |            |            | 0.666527                    |
| Thermal correction to Enthalpy=              |            |            | 0.667471                    |
| Thermal correction to Gibbs Free Energy=     |            | 0.544648   |                             |
| Sum of electronic and zero-point Energies=   |            |            | -5710.059392                |
| Sum of electronic and thermal Energies=      |            |            | -5710.018602                |
| Sum of electronic and thermal Enthalpies=    |            |            | -5710.017658                |
| Sum of electronic and thermal Free Energies= |            |            | -5710.140480                |

#### TS4a

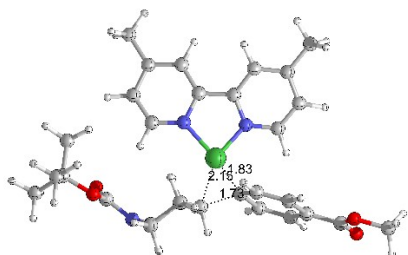

|    |             |             |             |
|----|-------------|-------------|-------------|
| Ni | 0.44254000  | 0.20263800  | -0.51067800 |
| C  | 1.59389700  | -1.21191200 | -0.36989900 |
| C  | 4.38888500  | -1.83727300 | -0.00325400 |
| C  | 2.45422500  | -1.59729900 | -1.46341500 |
| C  | 2.21786500  | -1.25982600 | 0.93020800  |
| C  | 3.56189800  | -1.52887300 | 1.09777300  |
| C  | 3.78971600  | -1.87619300 | -1.28717300 |
| H  | 2.03650600  | -1.63556800 | -2.46706200 |
| H  | 1.61856700  | -1.02997600 | 1.80718200  |
| H  | 3.99735200  | -1.50057700 | 2.09188500  |
| H  | 4.42057100  | -2.12295100 | -2.13660900 |
| N  | 1.57148400  | 1.70255100  | -0.43952200 |
| C  | 3.08197800  | 3.94969800  | 0.35859300  |
| C  | 2.92275000  | 1.68327000  | -0.46537100 |
| C  | 0.95813200  | 2.85235500  | -0.03609300 |
| C  | 1.68930400  | 3.96818000  | 0.38460100  |
| C  | 3.69612000  | 2.77172400  | -0.10289300 |
| N  | -1.01446900 | 1.54728700  | -0.31067900 |
| C  | -2.71444100 | 3.80414300  | -0.18220100 |
| C  | -2.34997200 | 1.43644100  | -0.46056600 |
| C  | -0.50764700 | 2.79963800  | -0.12038900 |
| C  | -1.33270600 | 3.92737500  | -0.05310200 |
| C  | -3.22093000 | 2.51270400  | -0.39587800 |
| H  | 3.36729800  | 0.75011400  | -0.79151300 |
| H  | 1.17044600  | 4.84968000  | 0.74833200  |
| H  | 4.77789500  | 2.69950300  | -0.16833300 |

|   |             |             |             |
|---|-------------|-------------|-------------|
| H | -2.73395500 | 0.43962100  | -0.64796100 |
| H | -0.89073500 | 4.91026900  | 0.07363200  |
| H | -4.28584000 | 2.34389500  | -0.51584400 |
| C | -3.63165000 | 4.99735700  | -0.11566300 |
| H | -4.20840600 | 5.10076000  | -1.04269100 |
| H | -4.35482900 | 4.88851700  | 0.70188100  |
| H | -3.07688800 | 5.92675800  | 0.04414900  |
| C | 3.90420300  | 5.12946600  | 0.80802200  |
| H | 4.52081500  | 4.86995900  | 1.67754100  |
| H | 4.58902600  | 5.45498700  | 0.01552200  |
| H | 3.27453400  | 5.98107400  | 1.08365800  |
| C | 5.81839200  | -2.11520100 | 0.11194100  |
| O | 6.26920900  | -2.05211300 | 1.40581500  |
| O | 6.57297300  | -2.37408300 | -0.81591400 |
| C | 7.66360200  | -2.31829000 | 1.56521700  |
| H | 7.86093900  | -2.23480800 | 2.63604200  |
| H | 7.91563700  | -3.32227800 | 1.20856500  |
| H | 8.26869900  | -1.59487600 | 1.00866000  |
| C | -1.98406500 | -3.00061000 | 0.65621600  |
| C | -0.86866900 | -1.95855400 | 0.83743200  |
| C | 0.00382500  | -1.89947600 | -0.43379400 |
| C | -0.84453800 | -1.64443500 | -1.70841800 |
| C | -2.00461200 | -2.65433500 | -1.77736300 |
| H | -1.34076600 | -0.99281300 | 1.05574800  |
| H | -0.24976500 | -2.22246000 | 1.70134400  |
| H | -1.54671800 | -3.99678200 | 0.50406300  |
| H | -2.64019100 | -3.04812700 | 1.52349900  |
| H | -1.27904300 | -0.64074700 | -1.75400800 |
| H | -0.22297000 | -1.75493600 | -2.60290100 |
| H | -2.68272300 | -2.42383600 | -2.59919000 |
| H | -1.60102200 | -3.66460100 | -1.92850100 |
| H | 0.38499500  | -2.91777500 | -0.56064800 |
| N | -2.77695400 | -2.67121700 | -0.53336100 |
| C | -3.93031400 | -1.93337200 | -0.47170700 |
| O | -4.42497700 | -1.35147000 | -1.43173600 |
| O | -4.44946300 | -1.94240900 | 0.78121300  |
| C | -5.75568700 | -1.33825200 | 1.06642900  |
| C | -5.71986700 | 0.16724500  | 0.78829800  |
| H | -5.63497300 | 0.35895600  | -0.28201600 |
| H | -6.63792300 | 0.63256800  | 1.16434000  |
| H | -4.86659400 | 0.62380800  | 1.30112800  |
| C | -6.84584600 | -2.05065200 | 0.26125100  |
| H | -7.83028200 | -1.67236500 | 0.55854900  |
| H | -6.70987300 | -1.88331700 | -0.80829500 |

|                                              |             |             |                             |
|----------------------------------------------|-------------|-------------|-----------------------------|
| H                                            | -6.81718500 | -3.12748400 | 0.45950500                  |
| C                                            | -5.91840400 | -1.60642900 | 2.56411200                  |
| H                                            | -6.87643000 | -1.21051900 | 2.91672200                  |
| H                                            | -5.88966000 | -2.68200100 | 2.76538300                  |
| H                                            | -5.11265700 | -1.12694800 | 3.12966800                  |
| Zero-point correction=                       |             |             | 0.626801 (Hartree/Particle) |
| Thermal correction to Energy=                |             |             | 0.664444                    |
| Thermal correction to Enthalpy=              |             |             | 0.665388                    |
| Thermal correction to Gibbs Free Energy=     |             |             | 0.554057                    |
| Sum of electronic and zero-point Energies=   |             |             | -3138.292992                |
| Sum of electronic and thermal Energies=      |             |             | -3138.255349                |
| Sum of electronic and thermal Enthalpies=    |             |             | -3138.254404                |
| Sum of electronic and thermal Free Energies= |             |             | -3138.365735                |

#### TS4b

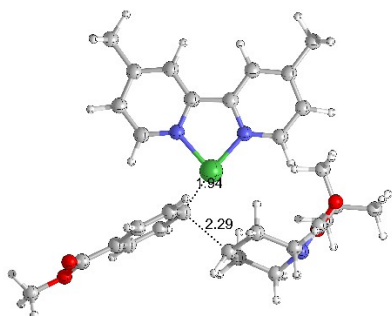

|    |             |             |             |
|----|-------------|-------------|-------------|
| Ni | -0.21073400 | 0.49209600  | -0.06474600 |
| C  | -1.62118000 | -0.82377000 | 0.13507700  |
| C  | -4.41143000 | -1.56328000 | 0.19804500  |
| C  | -2.46233600 | -0.60724100 | 1.27656900  |
| C  | -2.29849500 | -1.40832000 | -0.98191000 |
| C  | -3.63553000 | -1.77600000 | -0.95946300 |
| C  | -3.79629500 | -0.97017700 | 1.32006100  |
| H  | -2.02272100 | -0.15423400 | 2.16461300  |
| H  | -1.73463400 | -1.59199300 | -1.89545400 |
| H  | -4.10120500 | -2.21793400 | -1.83525600 |
| H  | -4.40172100 | -0.79588700 | 2.20533100  |
| N  | -1.19330900 | 2.15262100  | -0.43232700 |
| C  | -2.38028200 | 4.67244800  | -0.76624200 |
| C  | -2.47892400 | 2.26222700  | -0.80734200 |
| C  | -0.47340400 | 3.28370900  | -0.22036600 |
| C  | -1.04709300 | 4.54985200  | -0.37486100 |
| C  | -3.10221500 | 3.48798700  | -0.98725400 |
| N  | 1.21859700  | 1.69375300  | 0.29911900  |
| C  | 3.14095600  | 3.67869200  | 0.90078800  |
| C  | 2.46693400  | 1.36754400  | 0.70694400  |
| C  | 0.91348800  | 3.02461300  | 0.19519800  |
| C  | 1.85176900  | 4.01638300  | 0.48963400  |



|   |             |             |             |
|---|-------------|-------------|-------------|
| C | 3.43421600  | 2.30860300  | 1.01022300  |
| H | -3.00054400 | 1.32115200  | -0.94821400 |
| H | -0.45892400 | 5.44285300  | -0.18959500 |
| H | -4.14403100 | 3.52195400  | -1.29202100 |
| H | 2.68438900  | 0.31149100  | 0.80266900  |
| H | 1.57651300  | 5.06241800  | 0.39969900  |
| H | 4.41330300  | 1.96773400  | 1.33367100  |
| C | 4.17473400  | 4.72493700  | 1.22611400  |
| H | 4.49165900  | 4.65114400  | 2.27383000  |
| H | 5.07286600  | 4.59490000  | 0.61001800  |
| H | 3.79344300  | 5.73710000  | 1.05961600  |
| C | -3.03375700 | 6.01941300  | -0.93958400 |
| H | -3.86992800 | 6.13961000  | -0.24004300 |
| H | -2.32838300 | 6.83790700  | -0.76746300 |
| H | -3.44274100 | 6.12886700  | -1.95110800 |
| C | -5.83851600 | -1.91676000 | 0.28618900  |
| O | -6.31300000 | -2.48521900 | -0.86104000 |
| O | -6.55310300 | -1.73641600 | 1.25925700  |
| C | -7.69590500 | -2.84927800 | -0.82365300 |
| H | -7.91329100 | -3.28494500 | -1.80065200 |
| H | -7.88674600 | -3.57756700 | -0.02909400 |
| H | -8.32680900 | -1.97225600 | -0.64696700 |
| C | 1.65812500  | -3.82796200 | 0.00416200  |
| C | 0.41145700  | -2.99280000 | -0.35932700 |
| C | -0.31540700 | -2.54788400 | 0.87901400  |
| C | 0.54942900  | -1.92232400 | 1.94156600  |
| C | 1.84052100  | -2.73356400 | 2.19669700  |
| H | 0.75989300  | -2.10766000 | -0.91807400 |
| H | -0.24709100 | -3.55948200 | -1.02654800 |
| H | 1.36128300  | -4.75397100 | 0.51291800  |
| H | 2.23920900  | -4.09572500 | -0.87715900 |
| H | 0.83276200  | -0.91062500 | 1.61017800  |
| H | -0.00241300 | -1.79380200 | 2.87978300  |
| H | 2.54528200  | -2.17980200 | 2.81820700  |
| H | 1.59826500  | -3.67812600 | 2.69999100  |
| H | -1.12766800 | -3.18526800 | 1.21937800  |
| N | 2.50280200  | -3.06488300 | 0.93076200  |
| C | 3.53189500  | -2.27071200 | 0.50485900  |
| O | 4.08145100  | -1.41921600 | 1.20125000  |
| O | 3.87517600  | -2.55695000 | -0.77485700 |
| C | 4.99418600  | -1.88005400 | -1.43691300 |
| C | 4.73097800  | -0.37358000 | -1.52811800 |
| H | 4.80395000  | 0.09952900  | -0.54937700 |
| H | 5.46334900  | 0.08699200  | -2.20070900 |

|                                              |            |             |                             |
|----------------------------------------------|------------|-------------|-----------------------------|
| H                                            | 3.72939300 | -0.18916800 | -1.93234200                 |
| C                                            | 6.30304000 | -2.19793500 | -0.70861800                 |
| H                                            | 7.14734800 | -1.77868700 | -1.26736500                 |
| H                                            | 6.29752800 | -1.77627900 | 0.29752000                  |
| H                                            | 6.44140800 | -3.28223400 | -0.63877600                 |
| C                                            | 4.97599400 | -2.51339700 | -2.83019200                 |
| H                                            | 5.78636600 | -2.10377700 | -3.44214200                 |
| H                                            | 5.10532700 | -3.59808600 | -2.75910900                 |
| H                                            | 4.02333400 | -2.31108100 | -3.33059900                 |
| Zero-point correction=                       |            |             | 0.623614 (Hartree/Particle) |
| Thermal correction to Energy=                |            |             | 0.662242                    |
| Thermal correction to Enthalpy=              |            |             | 0.663186                    |
| Thermal correction to Gibbs Free Energy=     |            |             | 0.546882                    |
| Sum of electronic and zero-point Energies=   |            |             | -3138.264018                |
| Sum of electronic and thermal Energies=      |            |             | -3138.225390                |
| Sum of electronic and thermal Enthalpies=    |            |             | -3138.224446                |
| Sum of electronic and thermal Free Energies= |            |             | -3138.340749                |

P

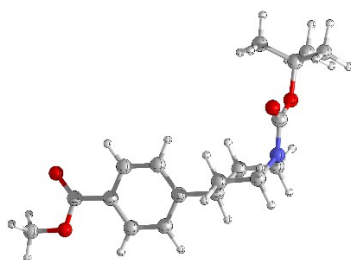

|   |             |             |             |
|---|-------------|-------------|-------------|
| C | 1.67865700  | 0.40324600  | -0.32155900 |
| C | 3.95916500  | -1.01465600 | 0.42965900  |
| C | 2.92889000  | 1.00210800  | -0.41905600 |
| H | 0.79616100  | 0.96361700  | -0.61860400 |
| C | 4.08128700  | 0.29760900  | -0.04367700 |
| H | 4.84692100  | -1.56472400 | 0.72132200  |
| H | 3.03702400  | 2.01791200  | -0.78515900 |
| C | 2.70116800  | -1.60577800 | 0.52382200  |
| H | 2.61648500  | -2.62519800 | 0.89310900  |
| C | 1.54203600  | -0.91196900 | 0.15235100  |
| C | -2.12174200 | -1.48306200 | 1.34195600  |
| C | -0.73312800 | -0.83179900 | 1.27766900  |
| C | 0.17817400  | -1.56418500 | 0.26465700  |
| C | -0.52957400 | -1.68486200 | -1.10551100 |
| C | -1.92586000 | -2.30477800 | -0.95594200 |
| H | -0.85472500 | 0.21778900  | 0.98024100  |
| H | -0.26559300 | -0.83473700 | 2.27008300  |
| H | -2.03627800 | -2.51360900 | 1.71334900  |
| H | -2.78562100 | -0.94067800 | 2.01280000  |

|                                              |             |             |                             |
|----------------------------------------------|-------------|-------------|-----------------------------|
| H                                            | -0.64076000 | -0.69212100 | -1.55951600                 |
| H                                            | 0.08206700  | -2.28607600 | -1.78925500                 |
| H                                            | -2.45682200 | -2.31868100 | -1.90746200                 |
| H                                            | -1.84732400 | -3.33646900 | -0.58722900                 |
| H                                            | 0.32429600  | -2.58693800 | 0.64432300                  |
| N                                            | -2.72375900 | -1.54384900 | 0.00775600                  |
| C                                            | -3.52156600 | -0.53747700 | -0.48978900                 |
| O                                            | -3.80026200 | -0.41324800 | -1.67395600                 |
| O                                            | -3.96320500 | 0.26849800  | 0.50702000                  |
| C                                            | -4.83838200 | 1.41257900  | 0.22091500                  |
| C                                            | -4.11460300 | 2.40916300  | -0.68962700                 |
| H                                            | -3.94561200 | 1.98094000  | -1.67823000                 |
| H                                            | -4.71723900 | 3.31838200  | -0.79246100                 |
| H                                            | -3.14924300 | 2.68589300  | -0.25103900                 |
| C                                            | -6.16151200 | 0.92901500  | -0.37950100                 |
| H                                            | -6.85444600 | 1.77335500  | -0.46669500                 |
| H                                            | -6.00412900 | 0.49308700  | -1.36658700                 |
| H                                            | -6.61745600 | 0.17647200  | 0.27301500                  |
| C                                            | -5.05857900 | 2.01038700  | 1.61215100                  |
| H                                            | -5.70465900 | 2.89181400  | 1.54530100                  |
| H                                            | -5.53349600 | 1.27860800  | 2.27370300                  |
| H                                            | -4.10380200 | 2.31033100  | 2.05653000                  |
| C                                            | 5.39337500  | 0.98822900  | -0.16864900                 |
| O                                            | 5.53948100  | 2.12628700  | -0.57187600                 |
| O                                            | 6.42980600  | 0.20671500  | 0.21955700                  |
| C                                            | 7.72382800  | 0.82045100  | 0.12006700                  |
| H                                            | 8.43298800  | 0.06631100  | 0.46349900                  |
| H                                            | 7.93546500  | 1.10662400  | -0.91424700                 |
| H                                            | 7.77574300  | 1.71370600  | 0.74934500                  |
| Zero-point correction=                       |             |             | 0.412978 (Hartree/Particle) |
| Thermal correction to Energy=                |             |             | 0.435648                    |
| Thermal correction to Enthalpy=              |             |             | 0.436592                    |
| Thermal correction to Gibbs Free Energy=     |             |             | 0.359064                    |
| Sum of electronic and zero-point Energies=   |             |             | -1056.316631                |
| Sum of electronic and thermal Energies=      |             |             | -1056.293961                |
| Sum of electronic and thermal Enthalpies=    |             |             | -1056.293017                |
| Sum of electronic and thermal Free Energies= |             |             | -1056.370545                |

**PC1**

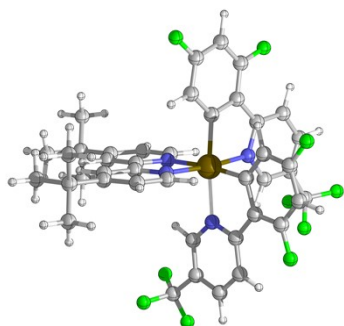

|    |             |             |             |
|----|-------------|-------------|-------------|
| Ir | 0.38406600  | -0.54457600 | 0.06296300  |
| C  | 0.11778600  | 2.10018000  | -1.59808300 |
| C  | 1.38911200  | 0.40158400  | -2.61648900 |
| C  | 0.30839800  | 2.96536600  | -2.66526700 |
| H  | -0.45883400 | 2.39846600  | -0.73007800 |
| C  | 1.61888100  | 1.24545300  | -3.72064800 |
| C  | 1.07892100  | 2.52349900  | -3.74465500 |
| H  | 2.21697500  | 0.89534500  | -4.54783100 |
| H  | 1.25806300  | 3.17971900  | -4.58999700 |
| C  | -2.26300300 | 0.56747300  | 0.89926700  |
| C  | -0.60099000 | 1.56374800  | 2.18342900  |
| C  | -3.24087600 | 1.31812200  | 1.55833800  |
| C  | -1.52861400 | 2.33388100  | 2.86666500  |
| H  | 0.45991500  | 1.62415600  | 2.40175900  |
| C  | -2.89746500 | 2.22779700  | 2.56408600  |
| H  | -4.27780900 | 1.19176500  | 1.28168500  |
| H  | -1.17616600 | 3.01311800  | 3.63432800  |
| C  | -1.67853000 | -1.94072100 | -1.69614500 |
| C  | -2.55619900 | -0.40824600 | -0.17418200 |
| C  | -2.94152200 | -2.25594700 | -2.16792000 |
| H  | -0.78843600 | -2.41707300 | -2.08753200 |
| C  | -3.84840200 | -0.69606600 | -0.61982000 |
| C  | -4.08059900 | -1.63241900 | -1.63195000 |
| H  | -3.02550000 | -2.99588400 | -2.95539700 |
| H  | -4.68235500 | -0.18239200 | -0.16360700 |
| C  | 2.44137300  | -0.84611600 | 2.14622600  |
| C  | 2.96935700  | 0.91023900  | 0.66219900  |
| C  | 3.63436500  | -0.59924600 | 2.84932800  |
| C  | 4.15091200  | 1.18892200  | 1.32962300  |
| H  | 2.67593900  | 1.47094500  | -0.21517900 |
| C  | 4.48788300  | 0.41560200  | 2.44449500  |
| H  | 3.88153500  | -1.21332100 | 3.70212400  |
| H  | 5.41419100  | 0.60234700  | 2.97764000  |
| C  | 1.50482800  | -1.64533800 | -1.23379100 |
| C  | 1.93084400  | -2.96262300 | -1.03731300 |
| C  | 1.87239800  | -0.96974500 | -2.44170700 |

|   |             |             |             |
|---|-------------|-------------|-------------|
| C | 2.70213000  | -3.59616500 | -2.00858100 |
| H | 1.67572900  | -3.51005800 | -0.13724600 |
| C | 2.65518000  | -1.66636400 | -3.38144200 |
| C | 3.07979900  | -2.97006900 | -3.19241000 |
| H | 3.68169700  | -3.47441700 | -3.93785500 |
| C | 0.33616500  | -1.93072700 | 1.53852700  |
| C | 1.44546300  | -1.86983800 | 2.43482700  |
| C | -0.65072700 | -2.89822600 | 1.74691200  |
| C | 1.50426700  | -2.78876500 | 3.49723000  |
| C | -0.53609800 | -3.78274400 | 2.81610300  |
| H | -1.50781200 | -2.99233300 | 1.08934900  |
| C | 0.53200900  | -3.75119100 | 3.70898100  |
| H | 0.60464700  | -4.44773800 | 4.53461400  |
| N | -1.47635700 | -1.03632900 | -0.71669100 |
| N | -0.95172900 | 0.70130100  | 1.21442900  |
| N | 0.64164300  | 0.86758400  | -1.56868700 |
| N | 2.13711800  | -0.06876900 | 1.05460000  |
| F | 3.09877700  | -4.85931500 | -1.80181300 |
| F | 3.02607200  | -1.07019700 | -4.53577300 |
| F | -1.49136200 | -4.70651800 | 2.99904900  |
| F | 2.53762800  | -2.75829100 | 4.36597300  |
| C | -5.47933100 | -1.98228500 | -2.14688900 |
| C | -3.92868700 | 3.08076600  | 3.30911900  |
| C | -6.58339700 | -1.19217100 | -1.42079500 |
| H | -7.55999300 | -1.47897900 | -1.82247500 |
| H | -6.59815500 | -1.40396700 | -0.34517900 |
| H | -6.47618900 | -0.11070400 | -1.56543100 |
| C | -5.54958800 | -1.65766300 | -3.65886700 |
| H | -5.37209900 | -0.59229200 | -3.84302400 |
| H | -4.81662100 | -2.22980100 | -4.23696300 |
| H | -6.54366600 | -1.90890800 | -4.04362900 |
| C | -3.61637900 | 4.57452500  | 3.04796100  |
| H | -3.68003300 | 4.81097900  | 1.97992000  |
| H | -4.34061700 | 5.20151100  | 3.57876200  |
| H | -2.61716600 | 4.85253600  | 3.39877600  |
| C | -5.36888100 | 2.79075300  | 2.84834500  |
| H | -5.65420000 | 1.74777800  | 3.02971100  |
| H | -6.06442400 | 3.42162100  | 3.41013900  |
| H | -5.51224500 | 3.01548800  | 1.78496700  |
| C | -3.82588800 | 2.78380700  | 4.82478900  |
| H | -4.02840200 | 1.72798500  | 5.03565500  |
| H | -2.83698900 | 3.02765800  | 5.22618800  |
| H | -4.56062200 | 3.38658100  | 5.36896600  |
| C | -0.36167300 | 4.31191400  | -2.66445300 |

|                                              |             |             |                             |
|----------------------------------------------|-------------|-------------|-----------------------------|
| F                                            | 0.33248400  | 5.20785800  | -3.38712100                 |
| F                                            | -1.60386700 | 4.23569100  | -3.19048100                 |
| F                                            | -0.49233500 | 4.79018100  | -1.40574700                 |
| C                                            | 5.00499600  | 2.34318800  | 0.87883600                  |
| F                                            | 4.64871300  | 3.48321900  | 1.50990300                  |
| F                                            | 4.86980500  | 2.56150700  | -0.44763700                 |
| F                                            | 6.30474200  | 2.12116300  | 1.14154300                  |
| C                                            | -5.72728500 | -3.49468600 | -1.92681300                 |
| H                                            | -5.00068800 | -4.11339100 | -2.46336800                 |
| H                                            | -5.67494800 | -3.75343000 | -0.86346800                 |
| H                                            | -6.72401600 | -3.76185400 | -2.29347300                 |
| Zero-point correction=                       |             |             | 0.687686 (Hartree/Particle) |
| Thermal correction to Energy=                |             |             | 0.738582                    |
| Thermal correction to Enthalpy=              |             |             | 0.739527                    |
| Thermal correction to Gibbs Free Energy=     |             |             | 0.597433                    |
| Sum of electronic and zero-point Energies=   |             |             | -2942.135712                |
| Sum of electronic and thermal Energies=      |             |             | -2942.084815                |
| Sum of electronic and thermal Enthalpies=    |             |             | -2942.083871                |
| Sum of electronic and thermal Free Energies= |             |             | -2942.225965                |

## PC2

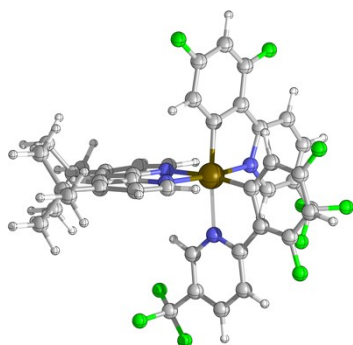

|    |             |             |             |
|----|-------------|-------------|-------------|
| Ir | 0.43040700  | -0.56569600 | 0.04393500  |
| C  | -0.10589400 | 2.12439800  | -1.49212900 |
| C  | 1.26614300  | 0.58095500  | -2.61975000 |
| C  | -0.02417800 | 3.04382200  | -2.52694900 |
| H  | -0.67473800 | 2.34082800  | -0.59569700 |
| C  | 1.39080800  | 1.48526400  | -3.69250600 |
| C  | 0.74595700  | 2.71298800  | -3.64567200 |
| H  | 1.98936100  | 1.22106900  | -4.55062000 |
| H  | 0.84315600  | 3.41576200  | -4.46670800 |
| C  | -2.24255500 | 0.42933400  | 0.96563100  |
| C  | -0.58769000 | 1.47091200  | 2.22693400  |
| C  | -3.21941900 | 1.20087900  | 1.59178400  |
| C  | -1.52225400 | 2.25939100  | 2.88870000  |
| H  | 0.47339500  | 1.54434100  | 2.44188600  |

|   |             |             |             |
|---|-------------|-------------|-------------|
| C | -2.88343500 | 2.14703200  | 2.57298300  |
| H | -4.25627600 | 1.07976900  | 1.30551500  |
| H | -1.17056400 | 2.95662400  | 3.63816100  |
| C | -1.63756200 | -2.04140200 | -1.66431400 |
| C | -2.52796800 | -0.57122900 | -0.08814700 |
| C | -2.90447300 | -2.43311400 | -2.07945000 |
| H | -0.74116400 | -2.46239000 | -2.10381100 |
| C | -3.81575600 | -0.93948900 | -0.46807500 |
| C | -4.04482200 | -1.88660100 | -1.47707700 |
| H | -2.97803000 | -3.17110400 | -2.86792500 |
| H | -4.66050500 | -0.48992000 | 0.03730000  |
| C | 2.54863000  | -0.81566700 | 2.08979600  |
| C | 2.91263500  | 1.04484000  | 0.63145600  |
| C | 3.75556000  | -0.47543200 | 2.78936800  |
| C | 4.08843700  | 1.38092900  | 1.29286200  |
| H | 2.57923100  | 1.62449800  | -0.21952100 |
| C | 4.51420200  | 0.59756000  | 2.41455300  |
| H | 4.05698100  | -1.09315100 | 3.62319700  |
| H | 5.42802100  | 0.85173500  | 2.93902200  |
| C | 1.58168800  | -1.51261100 | -1.33863400 |
| C | 2.11628200  | -2.79883300 | -1.21509500 |
| C | 1.85957700  | -0.75424000 | -2.52104900 |
| C | 2.91216600  | -3.32178800 | -2.23104900 |
| H | 1.92643300  | -3.40751900 | -0.33873400 |
| C | 2.67199200  | -1.34136900 | -3.50886700 |
| C | 3.20650800  | -2.61296600 | -3.39125100 |
| H | 3.82731700  | -3.03121200 | -4.17357100 |
| C | 0.51614000  | -2.02012100 | 1.41984600  |
| C | 1.69244400  | -1.90130000 | 2.31474500  |
| C | -0.37727400 | -3.06795400 | 1.60681400  |
| C | 1.84718800  | -2.91171200 | 3.33036600  |
| C | -0.15770600 | -4.00346600 | 2.61657300  |
| H | -1.24777100 | -3.19109900 | 0.97176700  |
| C | 0.95930600  | -3.93618200 | 3.48811200  |
| H | 1.10301700  | -4.68215900 | 4.26074900  |
| N | -1.44026300 | -1.13736700 | -0.68935500 |
| N | -0.93014800 | 0.58418900  | 1.28256800  |
| N | 0.51946700  | 0.94060900  | -1.53144600 |
| N | 2.13855900  | 0.02256900  | 0.99679800  |
| F | 3.41457200  | -4.55576600 | -2.09229200 |
| F | 2.96312400  | -0.66512400 | -4.64088100 |
| F | -1.01934800 | -5.01392500 | 2.78779400  |
| F | 2.90843800  | -2.85001000 | 4.16149700  |
| C | -5.47621500 | -2.27144800 | -1.86249500 |

|                                              |             |             |                             |
|----------------------------------------------|-------------|-------------|-----------------------------|
| C                                            | -3.97613500 | 2.99642900  | 3.23026500                  |
| C                                            | -6.21715600 | -1.00583400 | -2.35879200                 |
| H                                            | -7.24406800 | -1.26488100 | -2.63741500                 |
| H                                            | -6.26950900 | -0.22954800 | -1.58760100                 |
| H                                            | -5.72372800 | -0.57783700 | -3.23835800                 |
| C                                            | -5.50891200 | -3.33202000 | -2.97783900                 |
| H                                            | -5.03385900 | -2.97290000 | -3.89780600                 |
| H                                            | -5.01820100 | -4.26245700 | -2.67047800                 |
| H                                            | -6.54835000 | -3.57429600 | -3.21975000                 |
| C                                            | -4.70662800 | 3.80704300  | 2.13179900                  |
| H                                            | -5.18712000 | 3.15918200  | 1.39069300                  |
| H                                            | -5.48905900 | 4.42335300  | 2.58694800                  |
| H                                            | -4.01327700 | 4.47152500  | 1.60452400                  |
| C                                            | -4.98048700 | 2.05832900  | 3.94254300                  |
| H                                            | -4.48625500 | 1.47235200  | 4.72517800                  |
| H                                            | -5.77232700 | 2.65250400  | 4.41079600                  |
| H                                            | -5.45878900 | 1.36066900  | 3.24664700                  |
| C                                            | -3.40108900 | 3.98006100  | 4.26551900                  |
| H                                            | -2.89099900 | 3.46078700  | 5.08469700                  |
| H                                            | -2.70086200 | 4.68923400  | 3.80968200                  |
| H                                            | -4.21645600 | 4.56230600  | 4.70534000                  |
| C                                            | -0.80616700 | 4.32649500  | -2.45204500                 |
| F                                            | -0.19515600 | 5.31498200  | -3.12711900                 |
| F                                            | -2.04051800 | 4.17240700  | -2.97951900                 |
| F                                            | -0.96971000 | 4.72449700  | -1.16926000                 |
| C                                            | 4.88638000  | 2.57294800  | 0.86413400                  |
| F                                            | 4.87520200  | 3.53158500  | 1.81809300                  |
| F                                            | 4.40280700  | 3.12411400  | -0.27292100                 |
| F                                            | 6.17655900  | 2.24410900  | 0.65076400                  |
| C                                            | -6.19581000 | -2.84157500 | -0.61596900                 |
| H                                            | -5.68264300 | -3.73207500 | -0.23677800                 |
| H                                            | -6.25546600 | -2.11106700 | 0.19811600                  |
| H                                            | -7.22003200 | -3.12566500 | -0.87959900                 |
| Zero-point correction=                       |             |             | 0.683264 (Hartree/Particle) |
| Thermal correction to Energy=                |             |             | 0.734907                    |
| Thermal correction to Enthalpy=              |             |             | 0.735851                    |
| Thermal correction to Gibbs Free Energy=     |             |             | 0.590375                    |
| Sum of electronic and zero-point Energies=   |             |             | -2942.040203                |
| Sum of electronic and thermal Energies=      |             |             | -2941.988560                |
| Sum of electronic and thermal Enthalpies=    |             |             | -2941.987616                |
| Sum of electronic and thermal Free Energies= |             |             | -2942.133092                |

**PC3**



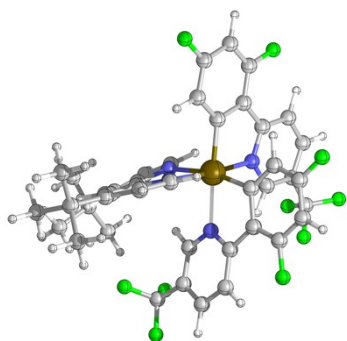

|    |             |             |             |
|----|-------------|-------------|-------------|
| Ir | 0.69573000  | -0.51496200 | 0.17899900  |
| C  | -1.07626100 | 1.58252300  | -1.34905300 |
| C  | 0.10581700  | 0.07917400  | -2.71518800 |
| C  | -1.80323100 | 2.08148000  | -2.42311000 |
| H  | -1.22565300 | 1.96890500  | -0.34899000 |
| C  | -0.58938700 | 0.56545800  | -3.84093800 |
| C  | -1.55373300 | 1.55380300  | -3.69171900 |
| H  | -0.38251100 | 0.15387100  | -4.81680200 |
| H  | -2.10755500 | 1.91613700  | -4.55132200 |
| C  | -1.93907300 | 0.15258400  | 1.32167100  |
| C  | -0.34729000 | 1.65858000  | 2.18991100  |
| C  | -2.97279700 | 1.04743800  | 1.71885800  |
| C  | -1.32264700 | 2.52938700  | 2.62874500  |
| H  | 0.70752900  | 1.87038500  | 2.34372400  |
| C  | -2.69544000 | 2.25129900  | 2.33044300  |
| H  | -3.99004700 | 0.79088600  | 1.45448900  |
| H  | -1.02997400 | 3.43014300  | 3.15474600  |
| C  | -1.15202900 | -2.83905200 | -0.59037700 |
| C  | -2.15038100 | -1.06874200 | 0.61633900  |
| C  | -2.35419100 | -3.49771400 | -0.72390800 |
| H  | -0.23436500 | -3.24561000 | -1.00084300 |
| C  | -3.40766400 | -1.71910200 | 0.48300600  |
| C  | -3.54280100 | -2.92225900 | -0.17630600 |
| H  | -2.37439700 | -4.44633400 | -1.24692300 |
| H  | -4.26463000 | -1.25100700 | 0.94915000  |
| C  | 3.24838400  | 0.17509700  | 1.47173600  |
| C  | 2.63912500  | 1.78234200  | -0.14252600 |
| C  | 4.41731900  | 0.90886200  | 1.75074300  |
| C  | 3.77538800  | 2.53722100  | 0.10400400  |
| H  | 1.91096400  | 2.07789700  | -0.88728800 |
| C  | 4.68029500  | 2.08717500  | 1.07186100  |
| H  | 5.10517500  | 0.54088900  | 2.49695600  |
| H  | 5.58292800  | 2.65314900  | 1.27741000  |
| C  | 1.60906300  | -1.39927000 | -1.41236500 |
| C  | 2.61445800  | -2.37546000 | -1.36380400 |

|   |             |             |             |
|---|-------------|-------------|-------------|
| C | 1.12984800  | -0.96960600 | -2.69522300 |
| C | 3.11857900  | -2.91807700 | -2.53901100 |
| H | 3.00190300  | -2.72894800 | -0.41455100 |
| C | 1.68149800  | -1.56174900 | -3.84464300 |
| C | 2.66762900  | -2.53190400 | -3.79857600 |
| H | 3.07099600  | -2.96195900 | -4.70652100 |
| C | 1.57808700  | -1.60363000 | 1.61604100  |
| C | 2.81919200  | -1.06904100 | 2.09083900  |
| C | 1.10276600  | -2.79820900 | 2.17603900  |
| C | 3.51604000  | -1.76457300 | 3.09398700  |
| C | 1.83948500  | -3.43633600 | 3.16341000  |
| H | 0.16530100  | -3.23605000 | 1.85292800  |
| C | 3.05447100  | -2.94542300 | 3.64433600  |
| H | 3.61210600  | -3.46167200 | 4.41522300  |
| N | -1.02562700 | -1.65379200 | 0.04260000  |
| N | -0.61365000 | 0.52354900  | 1.51559100  |
| N | -0.17275500 | 0.60799100  | -1.48464300 |
| N | 2.37819400  | 0.64305700  | 0.51704400  |
| F | 4.07871100  | -3.86056500 | -2.47163900 |
| F | 1.26188600  | -1.18769500 | -5.07987500 |
| F | 1.37443600  | -4.58425200 | 3.69231000  |
| F | 4.69578800  | -1.28662500 | 3.56410400  |
| C | -4.87888500 | -3.65765000 | -0.32197600 |
| C | -3.76824800 | 3.29783600  | 2.64642400  |
| C | -6.04840600 | -2.88590900 | 0.31560000  |
| H | -6.98042900 | -3.44476400 | 0.17581700  |
| H | -5.90353800 | -2.74857000 | 1.39324100  |
| H | -6.17978900 | -1.89925100 | -0.14344400 |
| C | -5.18927300 | -3.85355800 | -1.82506600 |
| H | -5.27421800 | -2.88637000 | -2.33359100 |
| H | -4.40889500 | -4.43120900 | -2.33095700 |
| H | -6.13711100 | -4.39112300 | -1.94936700 |
| C | -5.15789800 | 2.88402800  | 2.12899000  |
| H | -5.50797100 | 1.95611400  | 2.59584300  |
| H | -5.88764800 | 3.66674400  | 2.36424000  |
| H | -5.15007700 | 2.74737900  | 1.04171700  |
| C | -3.84561300 | 3.50537300  | 4.17635900  |
| H | -2.88240400 | 3.82128000  | 4.59128000  |
| H | -4.58558500 | 4.27772400  | 4.41928000  |
| H | -4.14019100 | 2.57768000  | 4.68022900  |
| C | -3.38494400 | 4.63226600  | 1.96016700  |
| H | -2.43424100 | 5.02683400  | 2.33342400  |
| H | -3.29184900 | 4.50106500  | 0.87696400  |
| H | -4.15568000 | 5.38874900  | 2.15131600  |

|                                              |             |             |                             |
|----------------------------------------------|-------------|-------------|-----------------------------|
| C                                            | -2.85613800 | 3.11231300  | -2.14602100                 |
| F                                            | -3.42822000 | 3.57286800  | -3.27604100                 |
| F                                            | -3.84385600 | 2.61017300  | -1.36210900                 |
| F                                            | -2.34584300 | 4.17524000  | -1.47651400                 |
| C                                            | 3.98287900  | 3.83884500  | -0.61328700                 |
| F                                            | 3.48699400  | 4.87927000  | 0.09613200                  |
| F                                            | 3.36772600  | 3.85036600  | -1.81617400                 |
| F                                            | 5.29491400  | 4.08732200  | -0.81362300                 |
| C                                            | -4.77483100 | -5.03971300 | 0.36574600                  |
| H                                            | -3.98018200 | -5.65298500 | -0.07148600                 |
| H                                            | -4.56154900 | -4.92644800 | 1.43467900                  |
| H                                            | -5.71857100 | -5.58860400 | 0.26029900                  |
| Zero-point correction=                       |             |             | 0.684431 (Hartree/Particle) |
| Thermal correction to Energy=                |             |             | 0.735319                    |
| Thermal correction to Enthalpy=              |             |             | 0.736263                    |
| Thermal correction to Gibbs Free Energy=     |             |             | 0.596110                    |
| Sum of electronic and zero-point Energies=   |             |             | -2942.288757                |
| Sum of electronic and thermal Energies=      |             |             | -2942.237869                |
| Sum of electronic and thermal Enthalpies=    |             |             | -2942.236925                |
| Sum of electronic and thermal Free Energies= |             |             | -2942.377078                |
